# Supplementary material for: Design, synthesis, and biological evaluation of novel ciprofloxacin derivatives as potential anticancer agents targeting topoisomerase II enzyme
Source: PubMed Central journal article supplement (PMC9635472; doi:10.1080/14756366.2022.2136172), 2022-10-28

## Supporting information

### **Design, Synthesis, and Biological Evaluation of Novel Ciprofloxacin Derivatives as Potential Anticancer Agents Targeting Topoisomerase II enzyme.**

Hadeer K. Swedan<sup>1</sup>, Asmaa E. Kassab<sup>2</sup>, Ehab M. Gedawy<sup>2,3</sup>, Salwa E. Elmeligie<sup>2</sup>

<sup>1</sup> Central Administration of Research and Health Development, Ministry of Health, and Population (MoHP), Cairo, P.O. Box 11516, Egypt.

<sup>2</sup> Department of Pharmaceutical Organic Chemistry, Faculty of Pharmacy, Cairo University, Kasr El-Aini Street, Cairo, P.O. Box 11562, Egypt.

<sup>3</sup> Department of Pharmaceutical Chemistry, Faculty of Pharmacy and Pharmaceutical Industries, Badr University in Cairo (BUC), Badr City, Cairo, P.O. Box 11829, Egypt.

**Correspondence to:** Asmaa E. Kassab, Department of Pharmaceutical Organic Chemistry, Faculty of Pharmacy, Cairo University, Cairo, P.O. Box 11562, Egypt.

Tel: 002023639307.

Fax: 002023635140.

E-mail: [asmaa.kassab@pharma.cu.edu.eg](mailto:asmaa.kassab@pharma.cu.edu.eg)

Address: 33 Kasr El-Aini Street, Cairo, Egypt.

# Compound 3

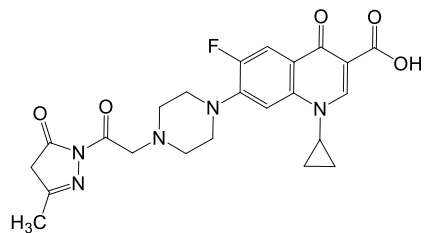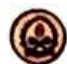

Dr\_Hader\_Kamel-E1

Dr\_Hader\_Kamel-E1

Sample Name: Dr\_Hader\_Kamel-E1  
Date collected: 2019-03-14

Pulse sequence: PROTON  
Solvent: DMSO

Temperature: 25  
Spectrometer: nuv400-maruzuy400

Laboratory: MOOCL  
NMR User:

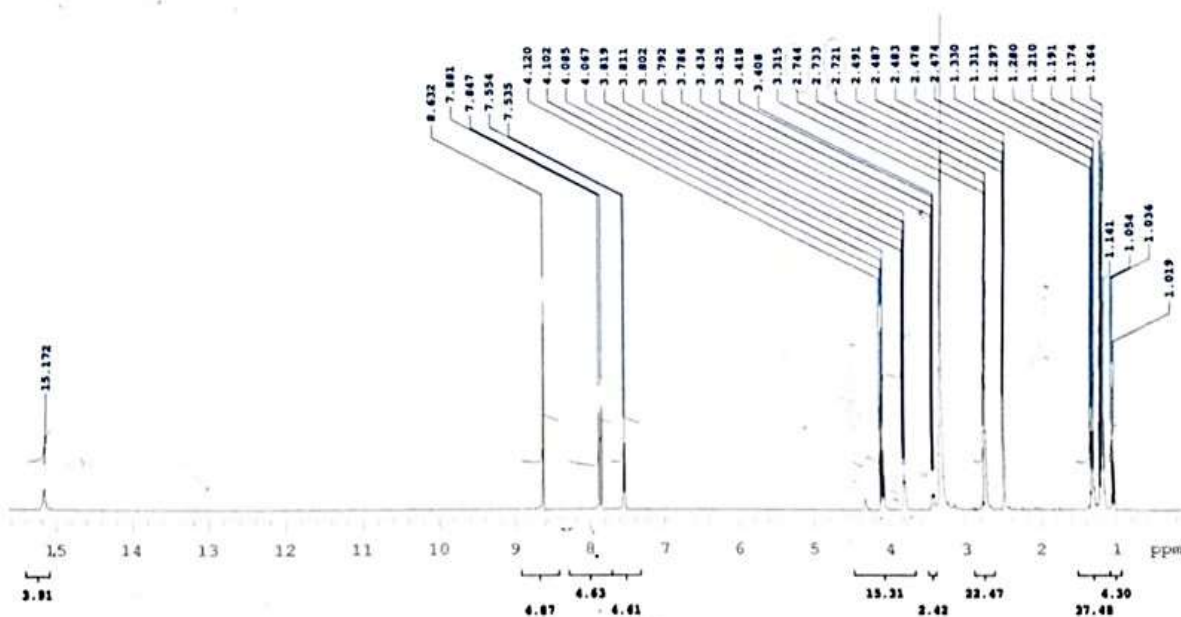

Plotname: Dr\_Hader\_Kamel-E1\_PROTON\_01\_plot02

Data file: home\data\1M\Hnad2019\Mar\E1\_Hader\_Kamel\_E1\_20190314\_01\Dr\_Hader\_Kamel\_E1\_PROTON\_01

Plot date: 2019-03-14

Asmaa Kassab\_C\_III

Microanalytical Unit - FOPCU - NMR laboratory  
www.pharma.cu.edu.eg dir-mau.fopcu@pharma.cu.edu.eg

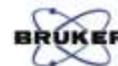

176.81  
176.78  
170.35  
166.39  
154.71  
152.23  
148.41  
145.89  
135.39  
133.63  
115.07  
113.00  
111.49  
111.26  
107.18  
106.90  
60.37  
58.63  
52.00  
49.89  
45.85  
40.62  
40.41  
40.20  
39.99  
39.78  
39.57  
39.36  
36.33  
14.62  
8.03

```
=====
Current Data Parameters
=====
NAME: Asmaa_Kassab_C_III
EXPNO: 13
PROCNO: 1
F2 - Acquisition Parameters
=====
Date_ 20211223
Time: 8.13
INSTRUM: spect
PROBHD: z ax (QNP) 5mm
PULPROG: zgpg30
SI: 32768
RG: 512
AQ: 0.321800 sec
RG2: 512.00
SFO: 25.130 MHz
AQ2: 5.00 sec
F4: 100.00 MHz
PC: 1.0000000 sec
SI1: 65536.000 sec
SI2: 1
=====
Channel f1
=====
NUC1: 13C
P1: 10.00 sec
PL1: 0.0000000 W
=====
Channel f2
=====
NAME: 403.130000 MHz
EXPNO: 13
PROCNO: 1
=====
```

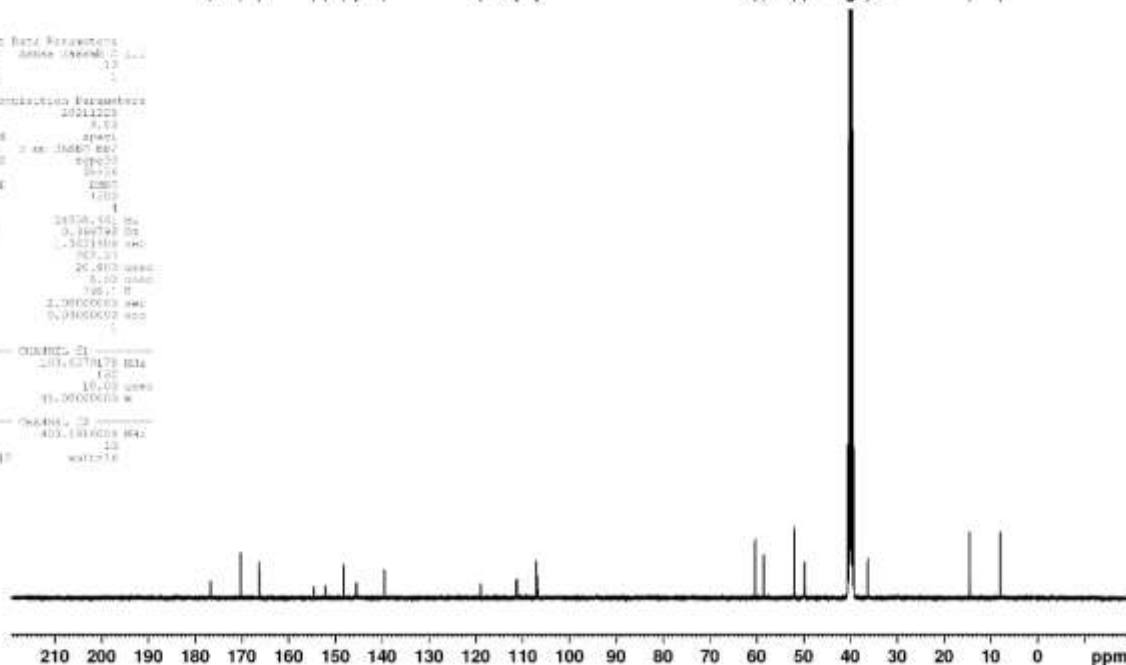

# Compound 4

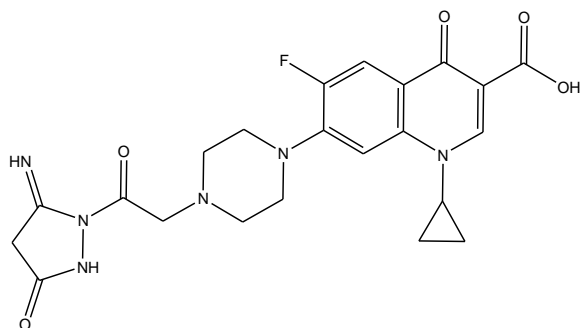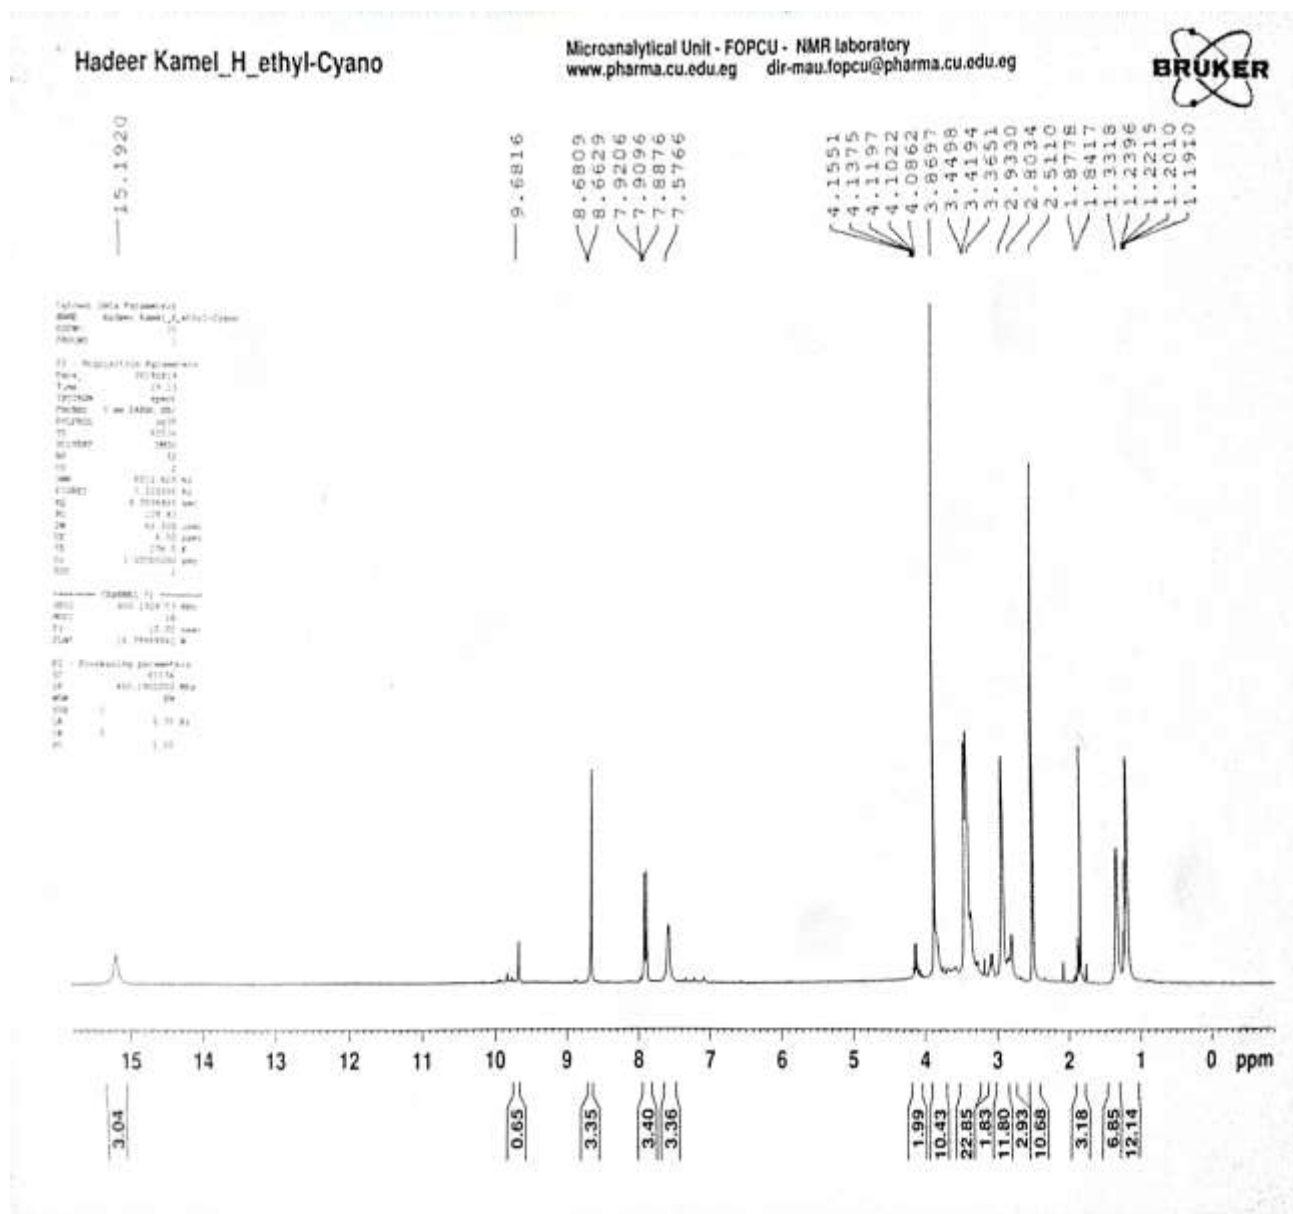

Asmaa Kassab\_C\_IV

Microanalytical Unit - FOPCU - NMR laboratory  
www.pharma.cu.edu.eg dir-mau.fopcu@pharma.cu.edu.eg

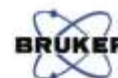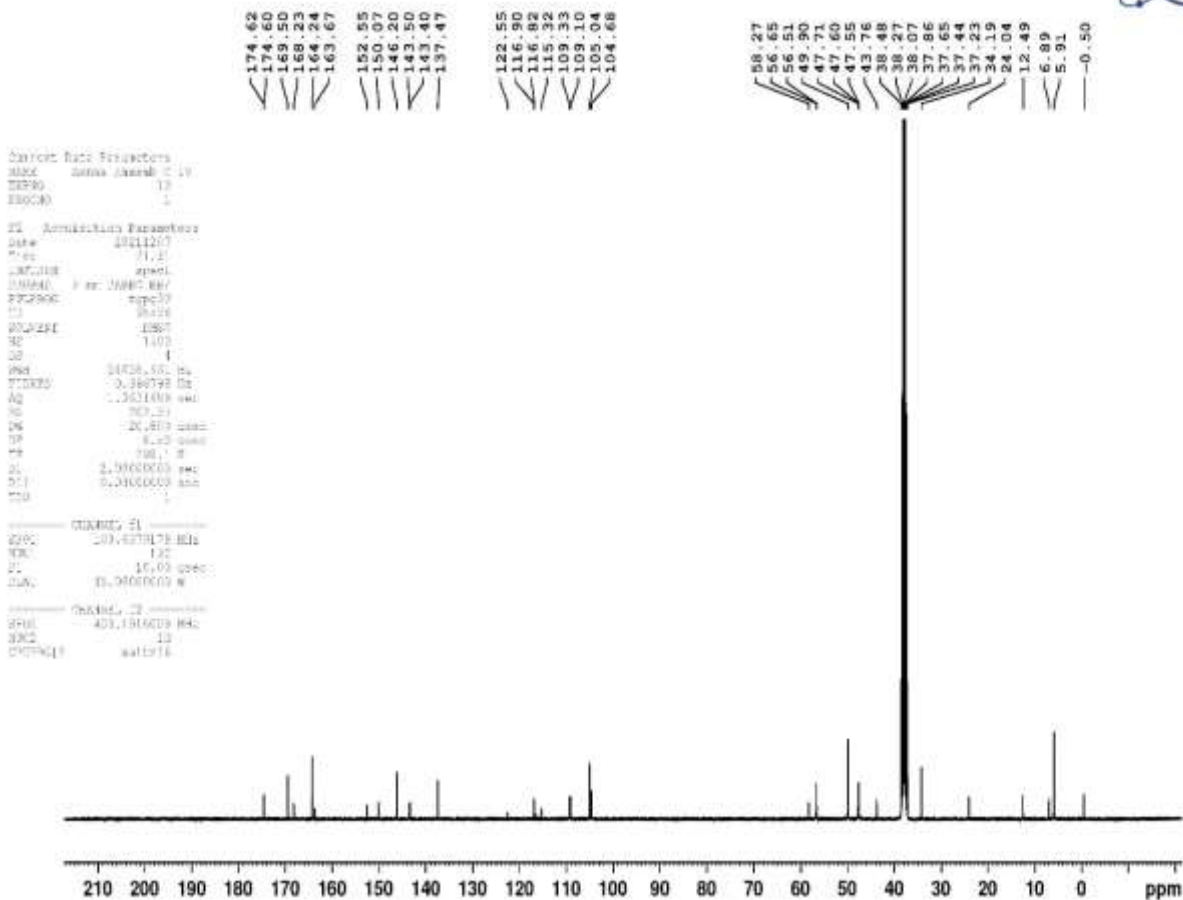

# Compound 5

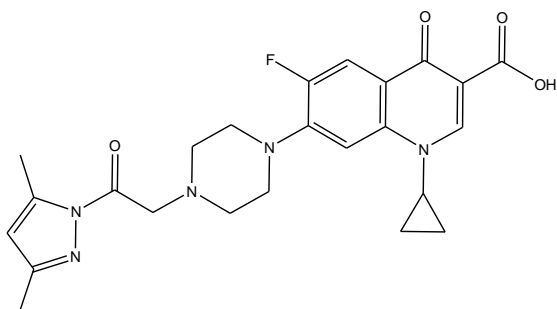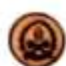

Dr\_Haider\_Kamal-AC

Dr\_Haider\_Kamal-AC

Sample Name: Dr\_Haider\_Kamal-AC  
Date collected: 2019-05-14

Pulse program: PROTON  
Solvent: DMSO

Temperature: 25  
Spectrometer: nmr-400-mercury400

Library: MOOCL  
NMR User:

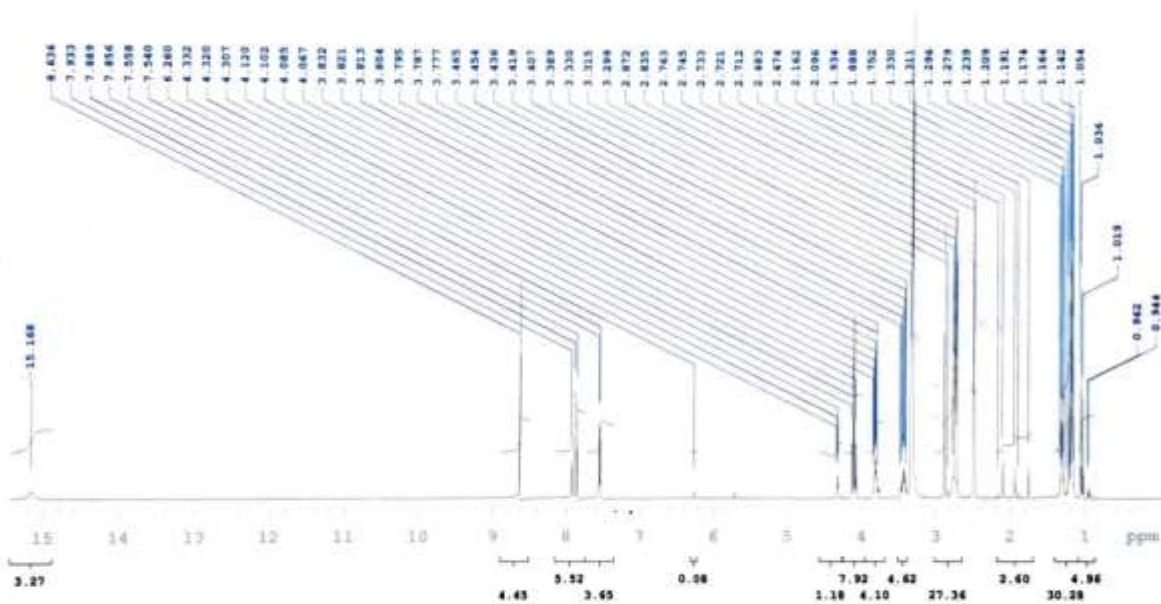

#f1otname: Dr\_Haider\_Kamal-AC\_PROTON\_01\_plot02

File: /home/haider/Work/2019/05/14/Dr\_Haider\_Kamal-AC\_20190514\_01.D; Haider\_Kamal-AC\_PROTON\_01

Printed: 2019-05-14

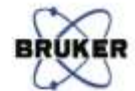

176.77  
 176.75  
 170.34  
 166.36  
  
 154.69  
 152.21  
 148.76  
 145.67  
 145.57  
 139.60  
  
 119.04  
 118.96  
 111.46  
 111.23  
 107.17  
 106.85  
 106.82  
  
 60.37  
 58.63  
 56.49  
 52.00  
 49.88  
 49.84  
 40.62  
 40.41  
 40.20  
 39.99  
 39.78  
 39.57  
 39.37  
 36.31  
 19.02  
 14.61  
 8.02

```

Current Date Parameters:
NAME      Asmaa_Kassab_C_V
EXPNO     10
PROCNO    1
----- Acquisition Parameters -----
Date_     20211228
Time      8.00
INSTRUM   spect
PROBHD    5 mm QNP6B 1H/
PULPROG   zgpg30
TD        65536
SFO       400
AQ        1.00
RG         4
DELTA     24758.000 sec
FIDRES    0.366798 Hz
AQ        1.3031400 sec
SFO       100.62
PC        20.870 sec
PR        8.00 sec
RG         981.00
AQ        2.7000000 sec
SFO       0.2500000 sec
TD        1
----- CHANNEL f1 -----
NUC1      13C
P1        120.0000000 Hz
NUC2      13C
PC        10.00 sec
PL1       05.0000000 dB
----- CHANNEL f2 -----
NAME      400.1316000 MHz
EXPNO     10
PROCNO    1
    
```

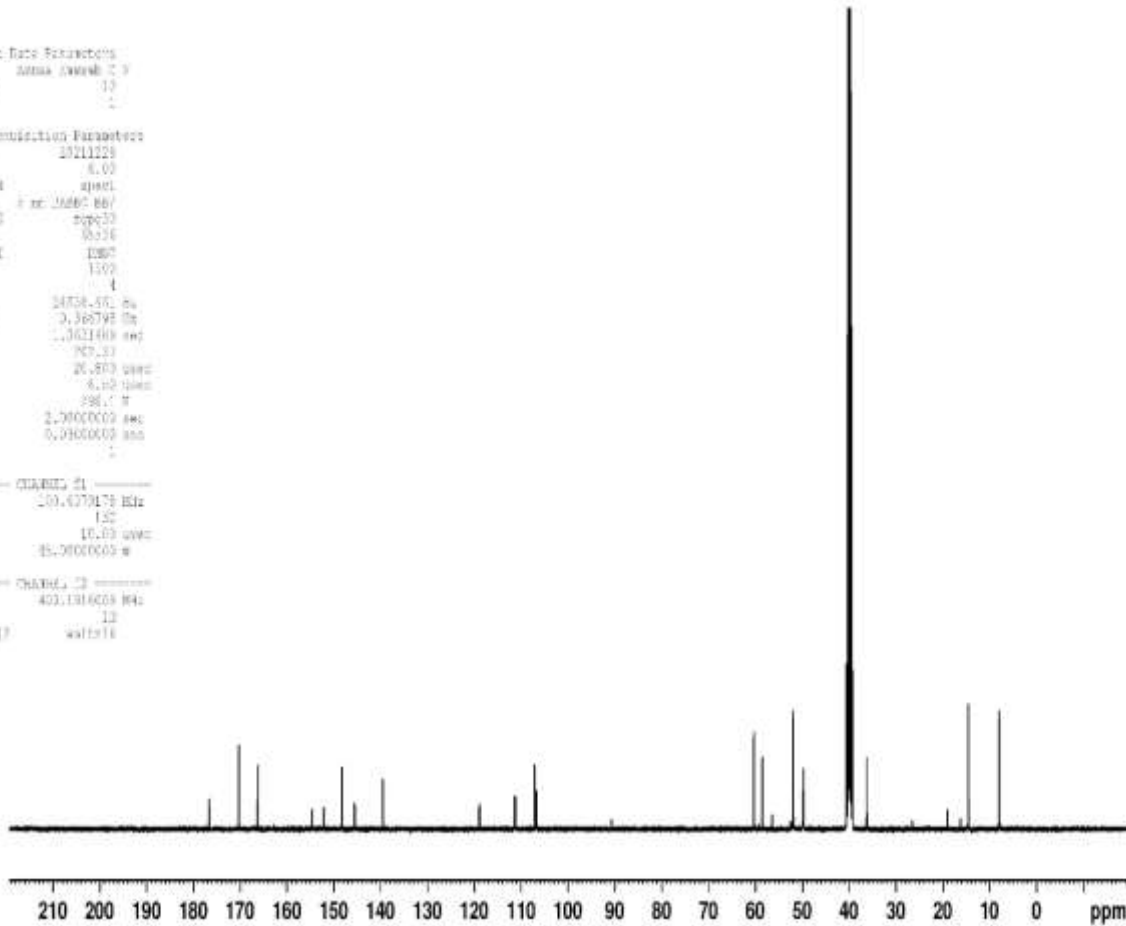

# Compound 6

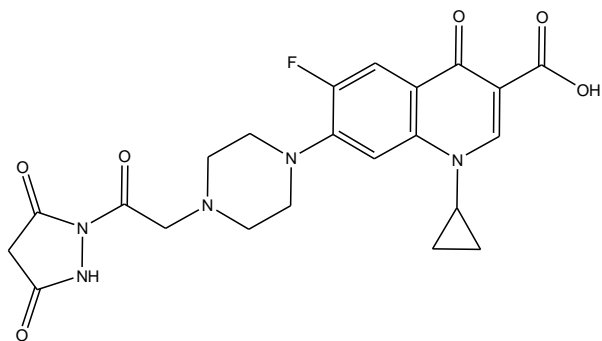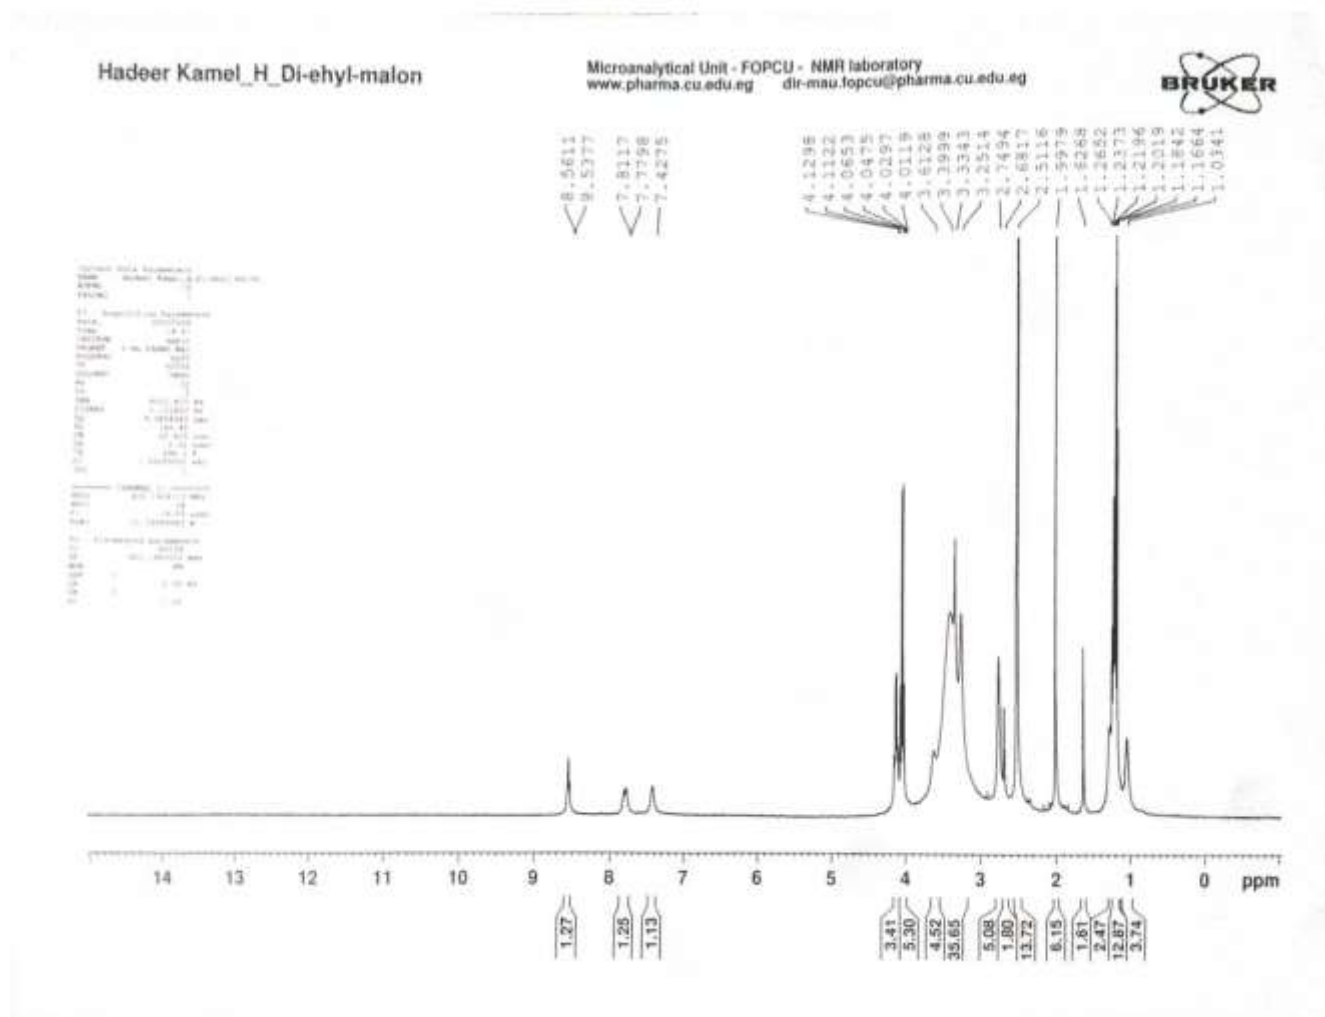



Asmaa Kassab\_C\_VI

Microanalytical Unit - FOPCU - NMR laboratory  
www.pharma.cu.edu.eg dir-mau.fopcu@pharma.cu.edu.eg

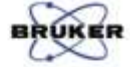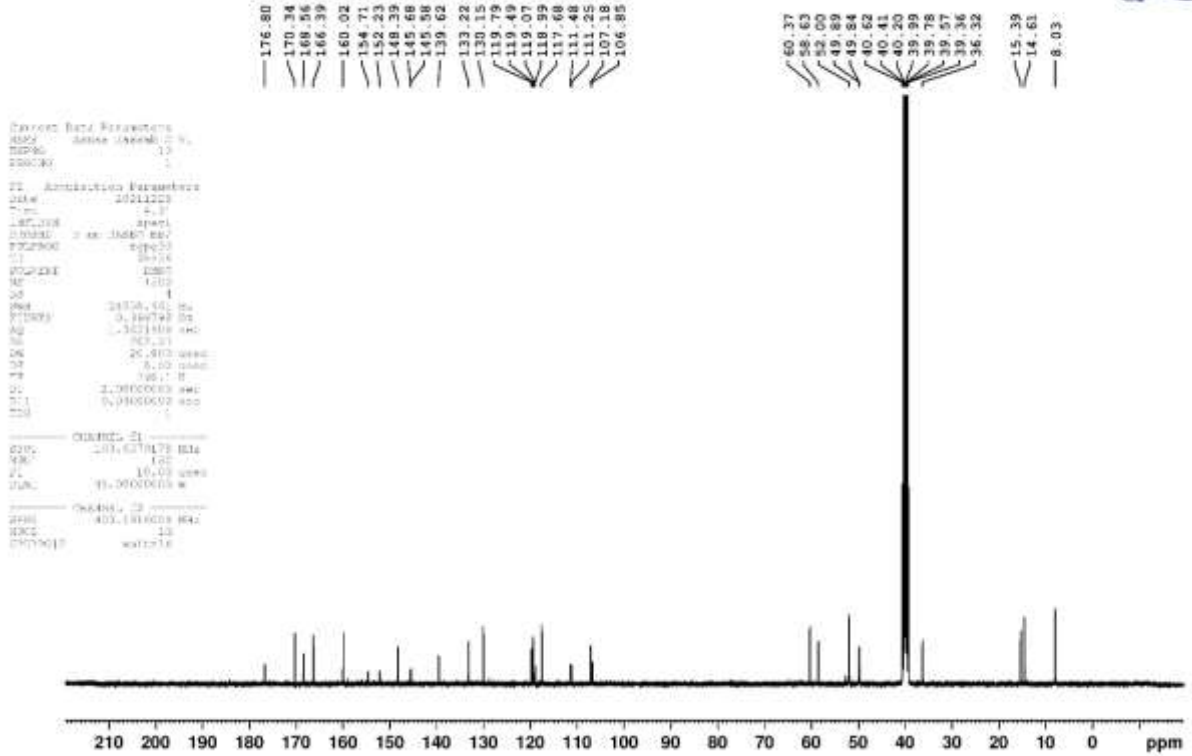

# Compound 7a

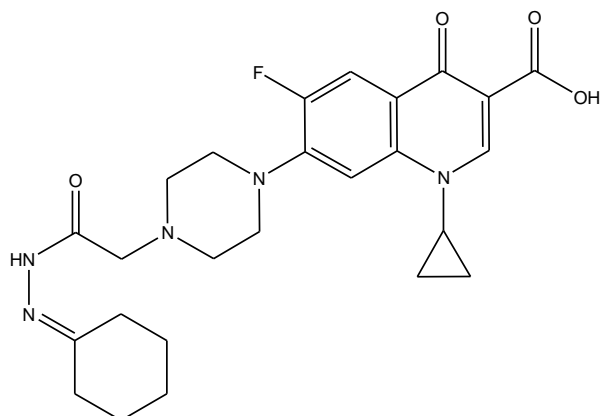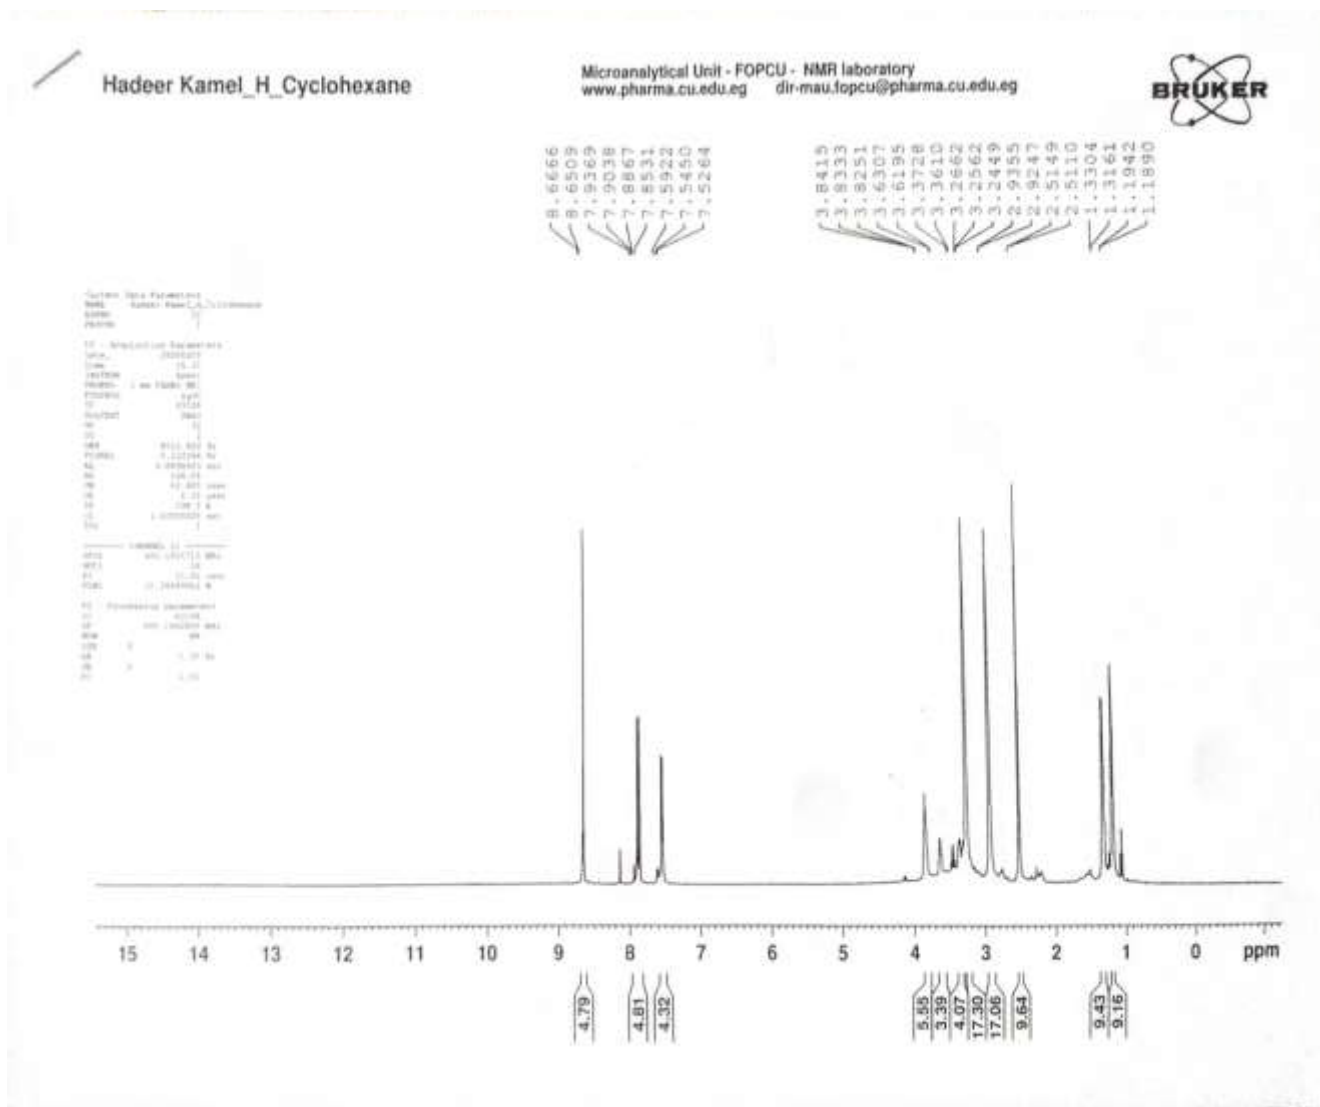

Asmaa Kassab\_C\_VII

Microanalytical Unit - FOPCU - NMR laboratory  
www.pharma.cu.edu.eg dir-mau.fopcu@pharma.cu.edu.eg

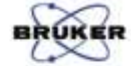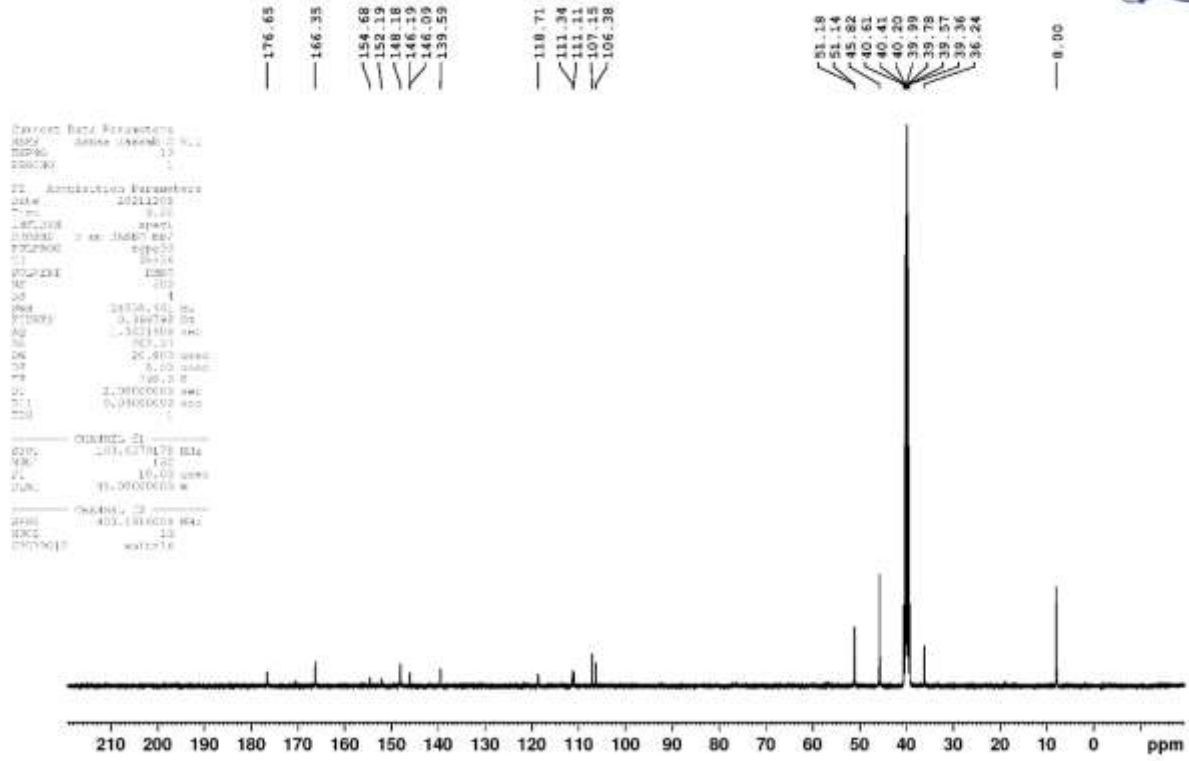

# Compound 7b

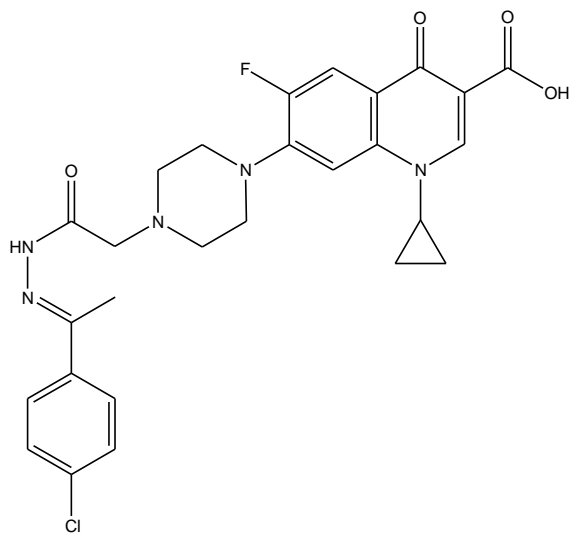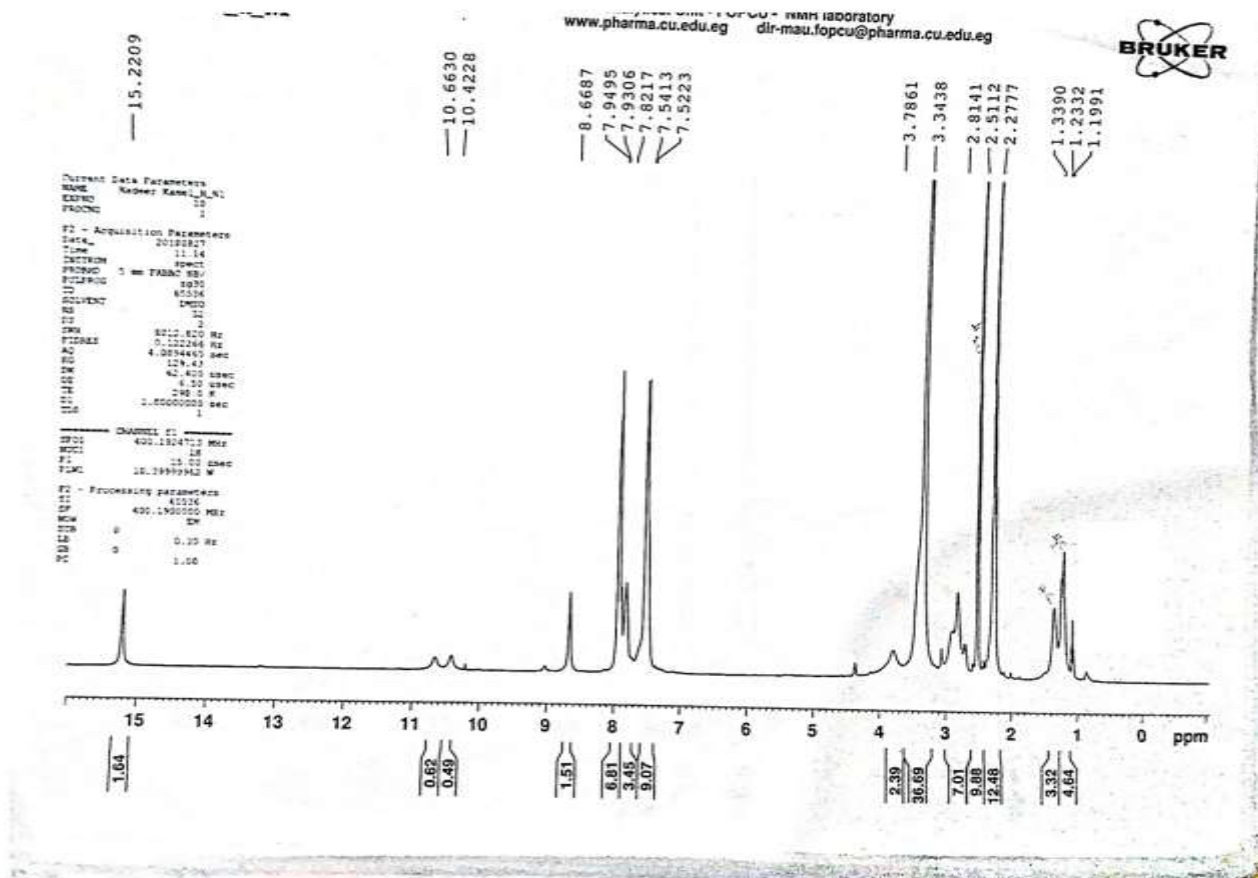

# Compound 7d

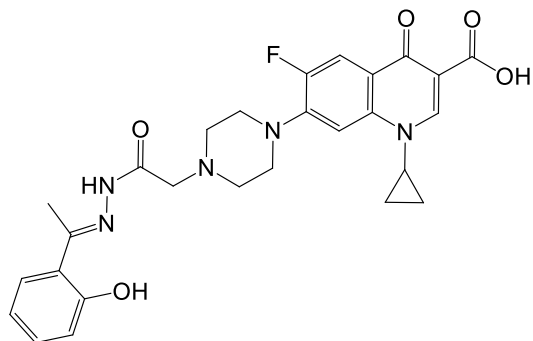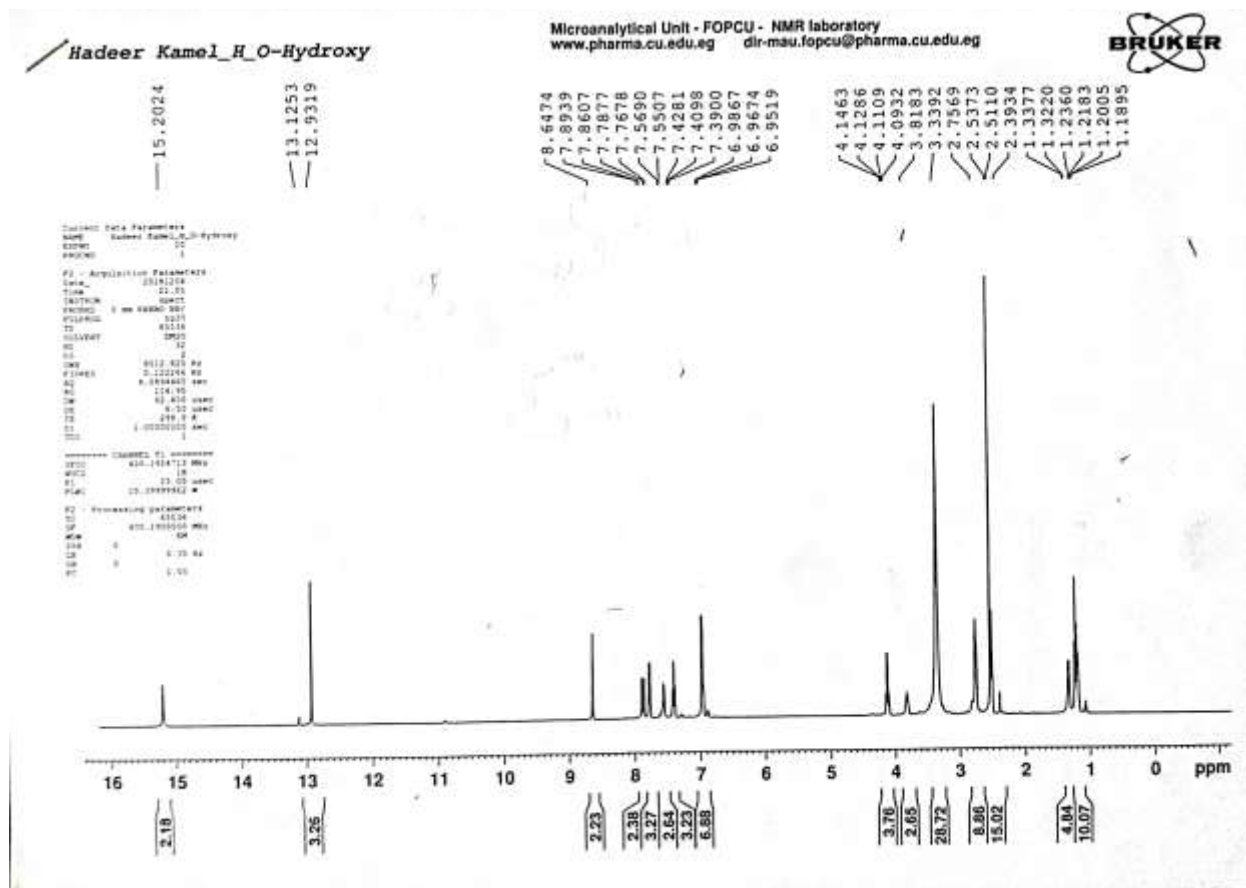



# Compound 7e

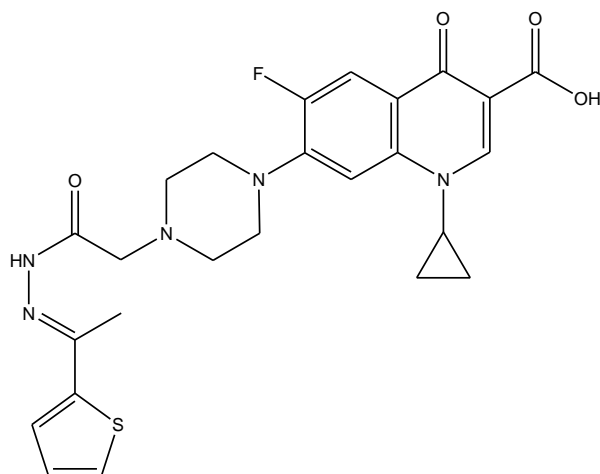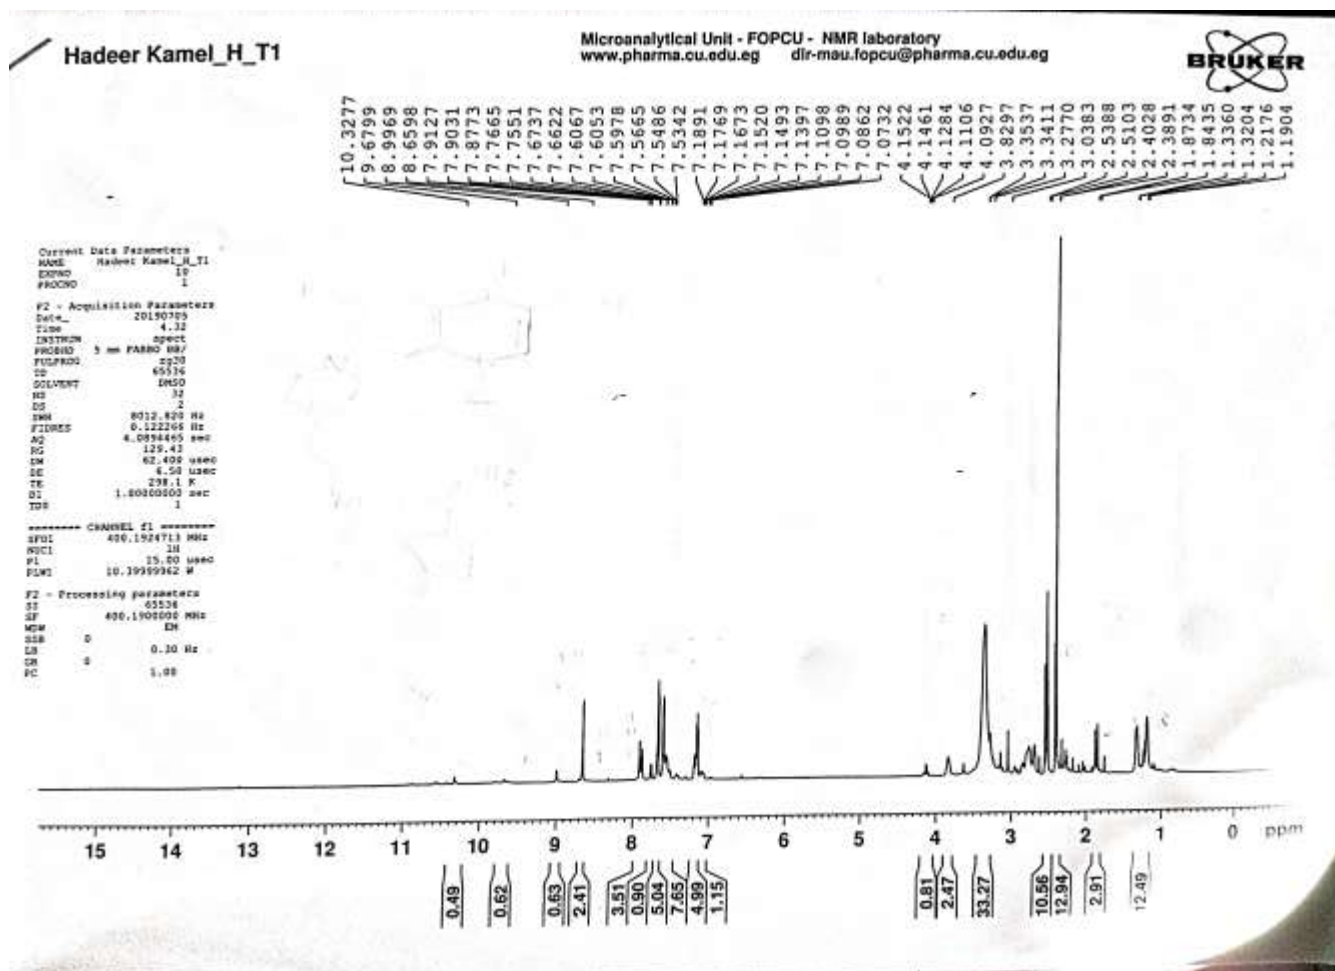

Asmaa Kassab\_C\_VIId

Microanalytical Unit - FOPCU - NMR laboratory  
www.pharma.cu.edu.eg dir-mau.topcu@pharma.cu.edu.eg

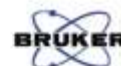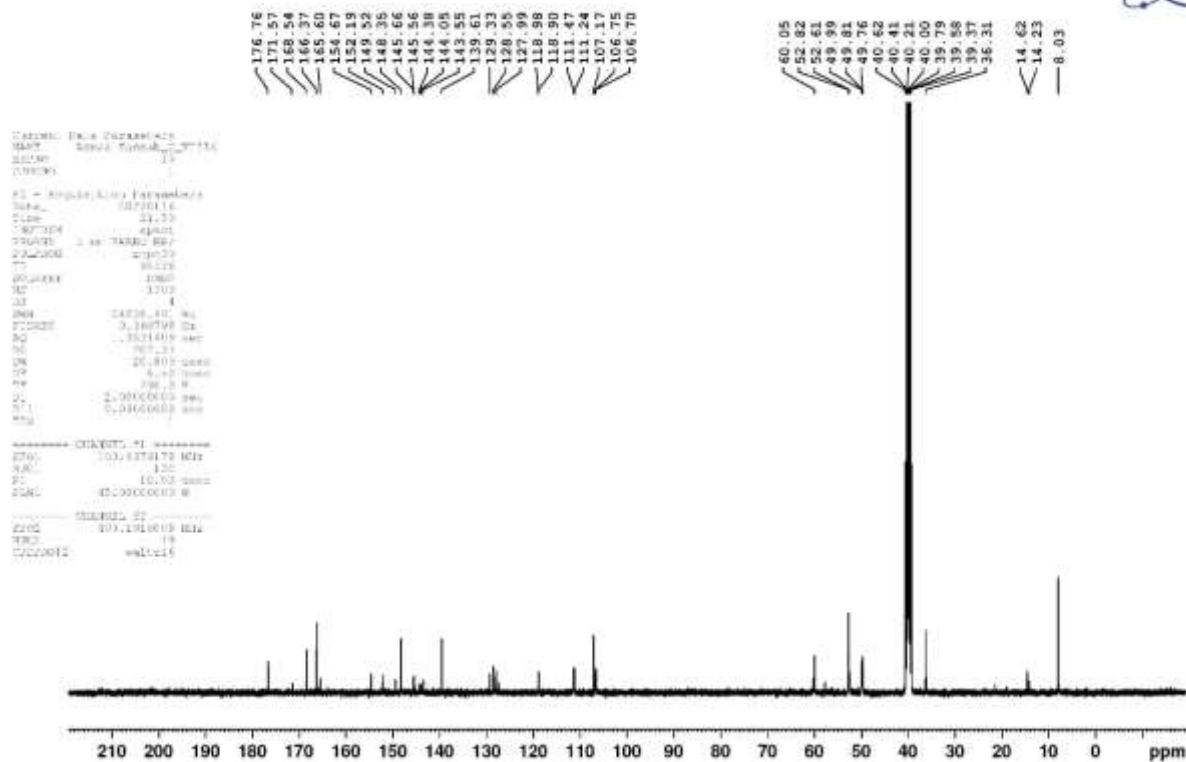



# Compound 8a

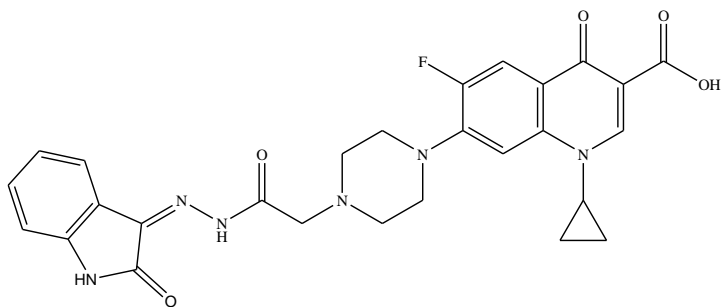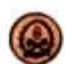

Dr\_Hader\_Kamal-18

Dr\_Hader\_Kamal-18

Sample Name: Dr\_Hader\_Kamal-18  
Date collected: 2019-03-14

Pulse sequence: PROTON  
Solvent: DMSO

Temperature: 35  
Spectrometer: spect-400

Lab: MOCC  
Lab: SAR USA

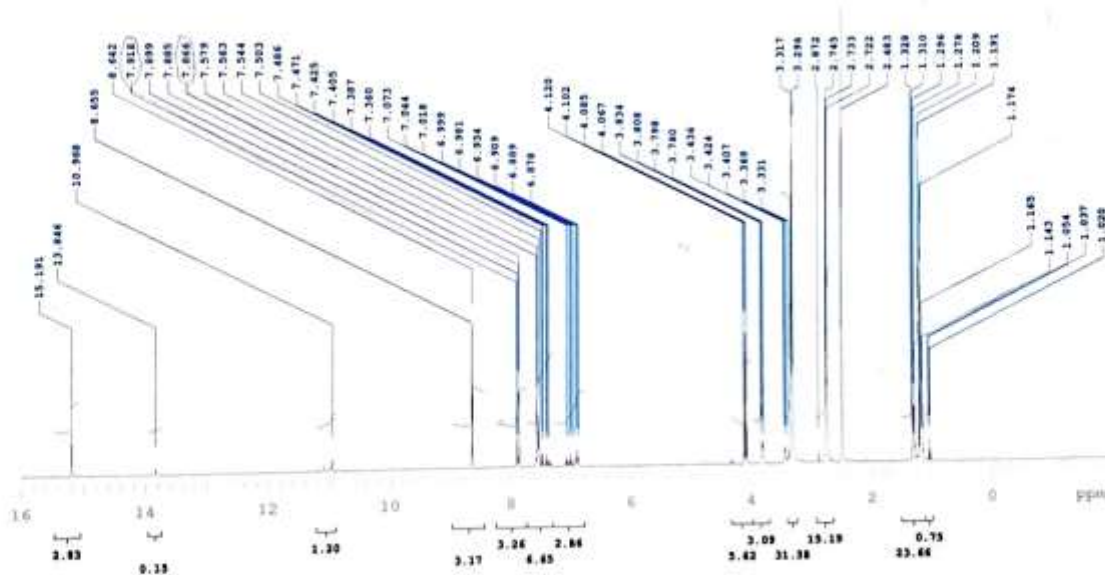

Plotname: Dr\_Hader\_Kamal-18\_PROTON\_01\_plot02

Data file: hader\drhader\20190314\Dr\_Hader\_Kamal-18\_20190314\_01.D, Dr\_Hader\_Kamal-18\_20190314\_01.F2

Printed: 2019-03-14

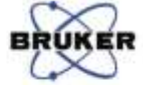

184.83  
 176.75  
 170.33  
 166.35  
 154.67  
 152.19  
 151.17  
 145.66  
 139.58  
 138.81  
 134.85  
 128.66  
 125.12  
 123.20  
 122.99  
 119.02  
 118.95  
 118.26  
 116.24  
 112.64  
 111.56  
 111.44  
 111.21  
 107.17  
 106.81  
 60.77  
 58.63  
 52.00  
 49.88  
 49.83  
 40.62  
 40.41  
 40.20  
 39.99  
 39.78  
 39.58  
 39.37  
 36.30  
 14.61  
 8.03

Current Data Variables  
 NAME Asmaa Kassab\_C\_IXa  
 EXPNO 10  
 PROCNO 1

===== Acquisition Parameters =====  
 Date\_ 20/2011  
 Time 20.35  
 INSTRUM spect  
 PROBHD 5 mm FATH2 90/  
 PULPROG zgpg30  
 ID 8558  
 SOLVENT water  
 NS 1200  
 DS 4  
 SWH 24039.462 Hz  
 FIDRES 0.366790 Hz  
 AQ 1.3331888 sec  
 RG 202.37  
 DN 20.000 c/sec  
 DE 6.50 c/sec  
 TE 300.2 K  
 U1 2.00000000 sec  
 U11 2.02000000 sec  
 TD0 1

===== CHANNEL f1 =====  
 NUC1 100.6179178 MHz  
 NUQ1 13C  
 P1 10.00 c/sec  
 P1A1 45.00000000 W

===== CHANNEL f2 =====  
 NUC2 400.1415008 MHz  
 NUQ2 1H  
 P1PFGH2 waltz16

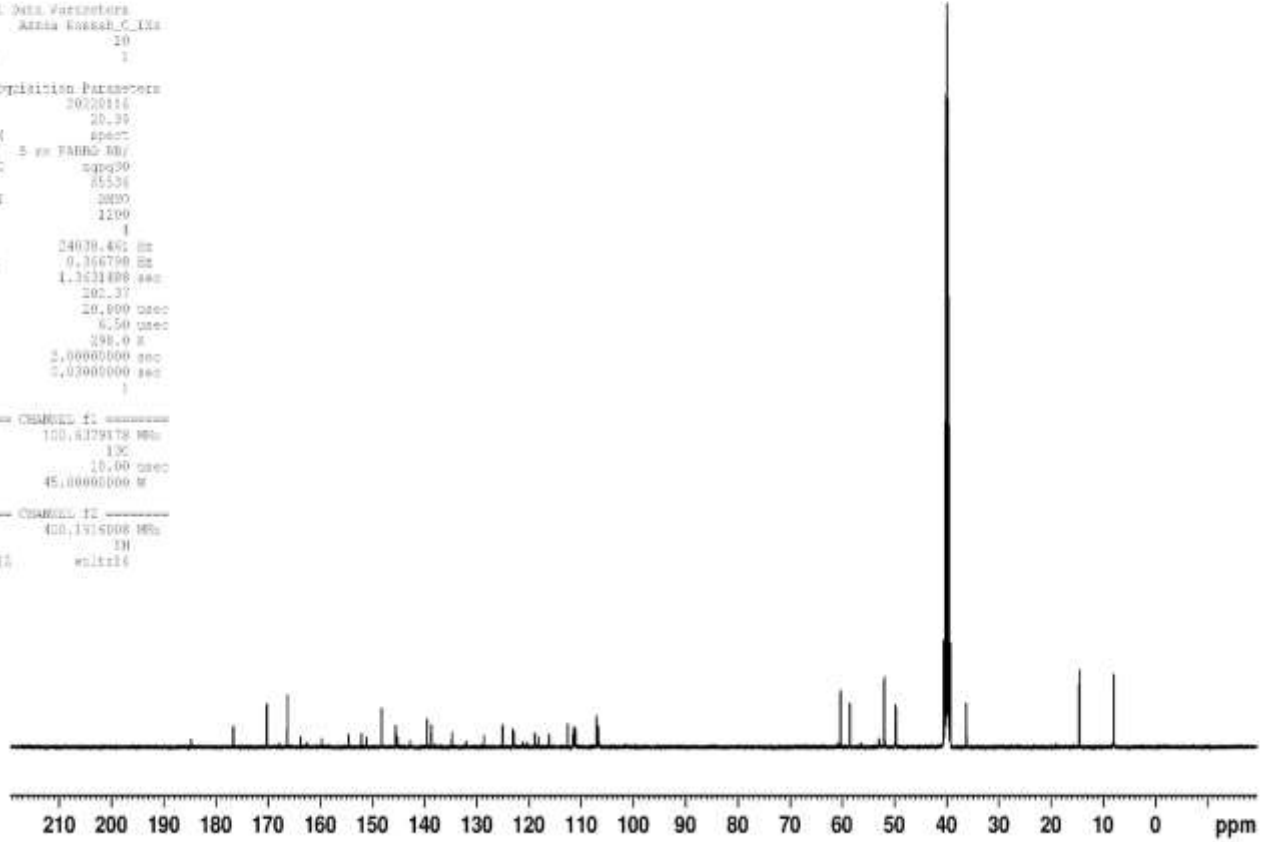

# Compound 8b

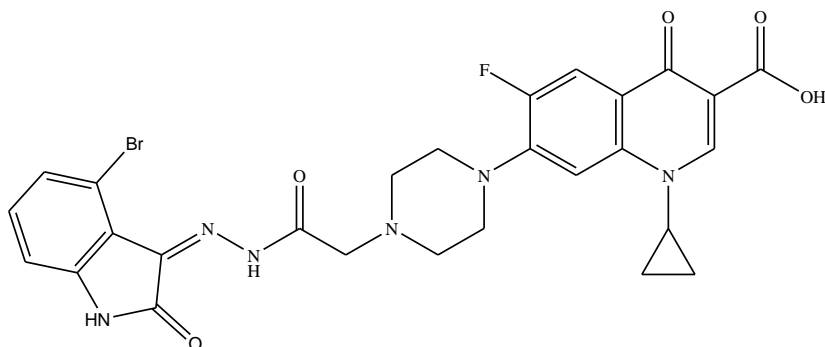

Hadeer Kamel\_H\_XV

Microanalytical Unit - FOPCU - NMR laboratory  
www.pharma.cu.edu.eg dir-mau.fopcu@pharma.cu.edu.eg

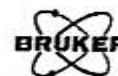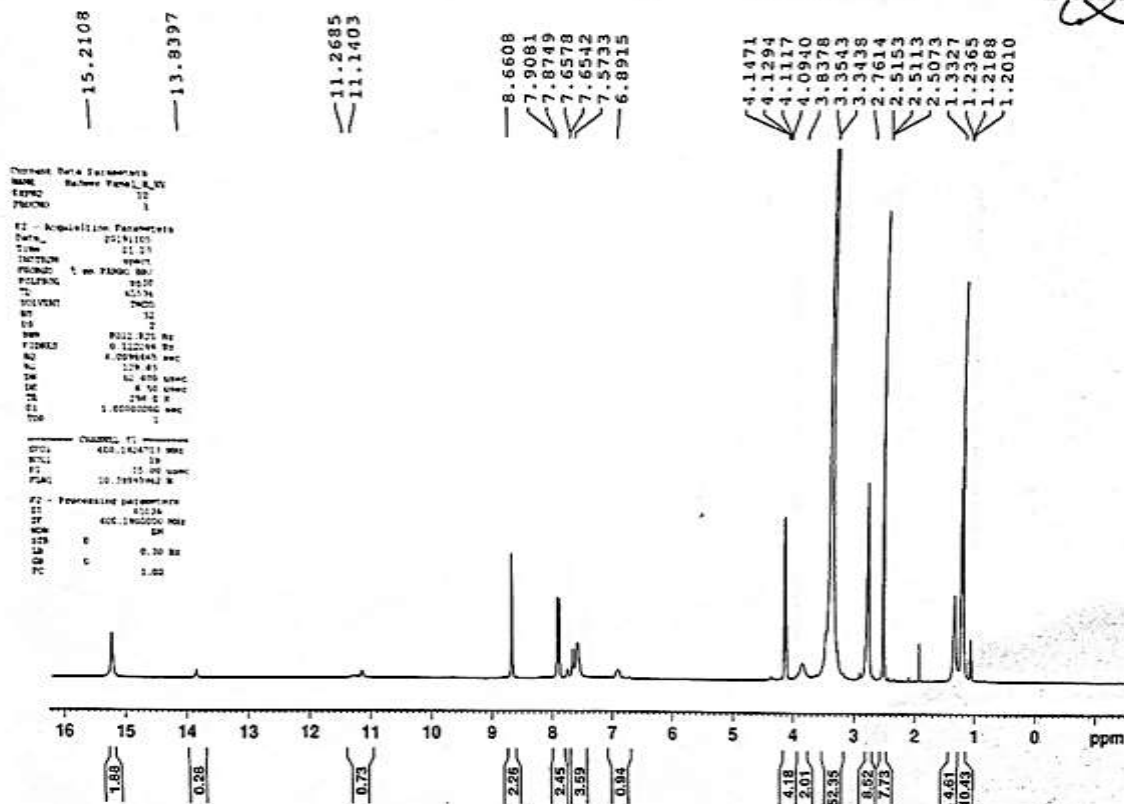

Asmaa Kassab\_C\_IXb

Microanalytical Unit - FOPCU - NMR laboratory  
www.pharma.cu.edu.eg dir-mau.fopcu@pharma.cu.edu.eg

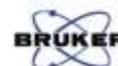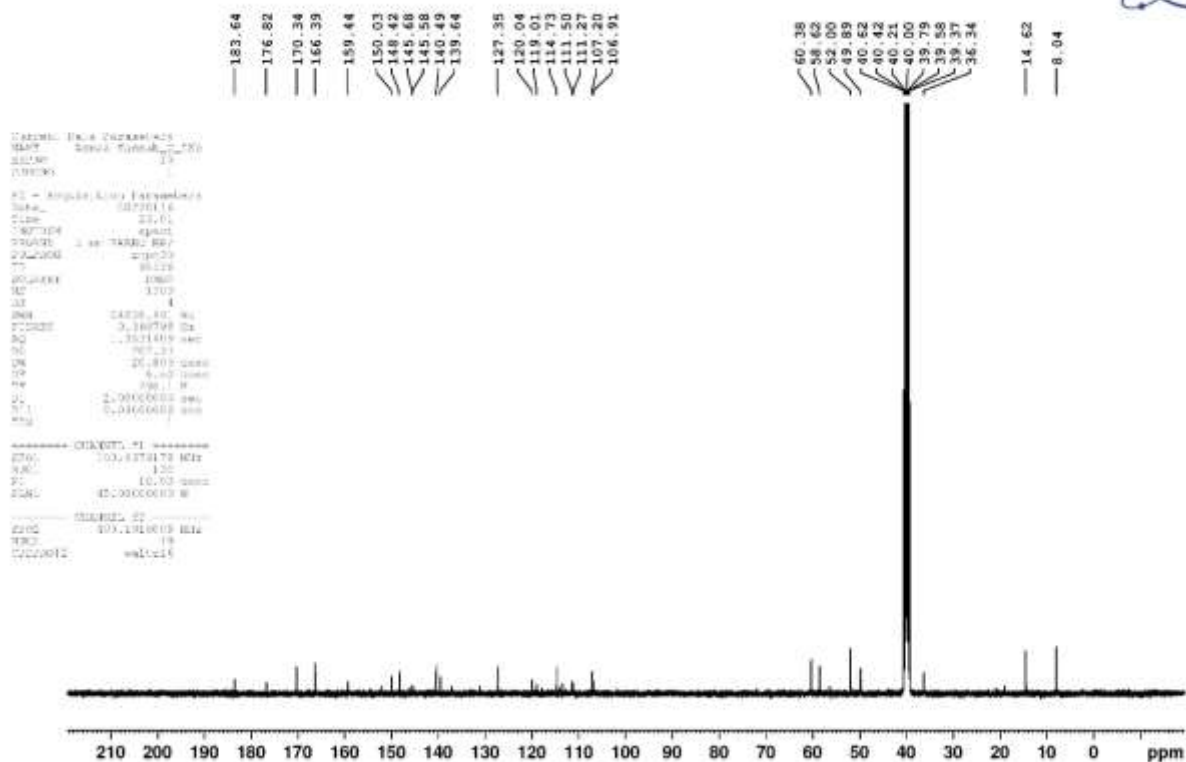

# Compound 9a

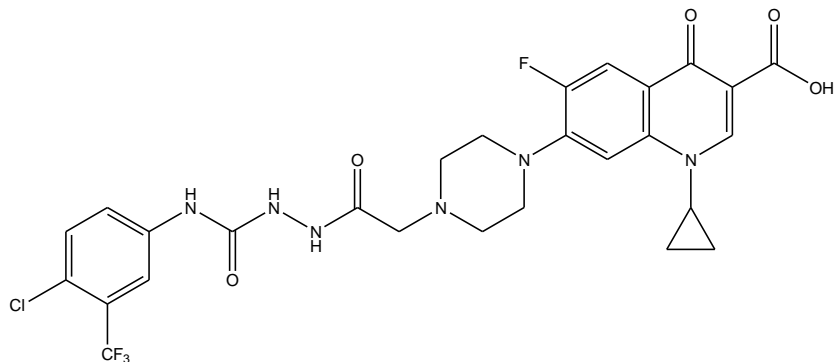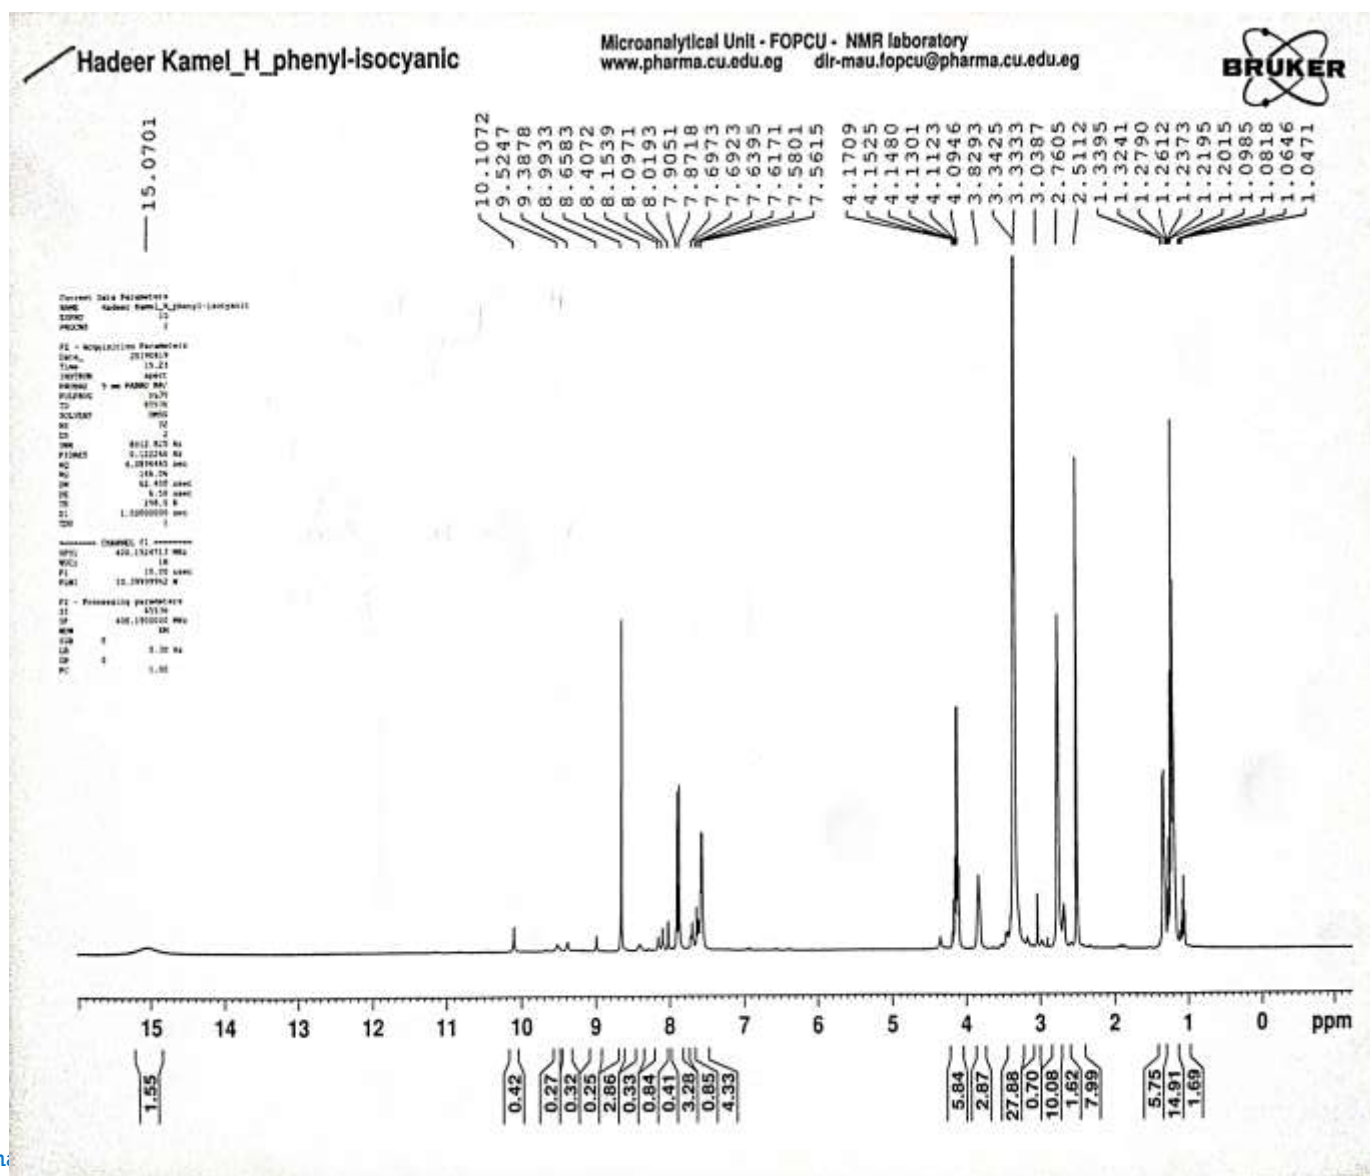

Asmaa Kassab\_C\_Xa

Microanalytical Unit - FOPCU - NMR laboratory  
www.pharma.cu.edu.eg dir-mau.topcu@pharma.cu.edu.eg

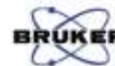

176.79  
176.77  
170.34  
166.30  
154.70  
152.22  
148.39  
145.68  
143.08  
139.62  
119.06  
118.98  
111.48  
111.25  
107.18  
106.88  
106.85  
60.37  
58.63  
52.00  
49.89  
49.84  
40.62  
40.41  
40.20  
39.99  
39.78  
39.58  
39.37  
36.32  
14.62  
8.03

```
===== CHANNEL F1 =====  
NAME: 103.1374173 MHz  
NUC1: 13C  
PC: 10.00 sec  
===== CHANNEL F2 =====  
NAME: 400.1418019 MHz  
NUC2: 1H  
PC: 1.00 sec
```

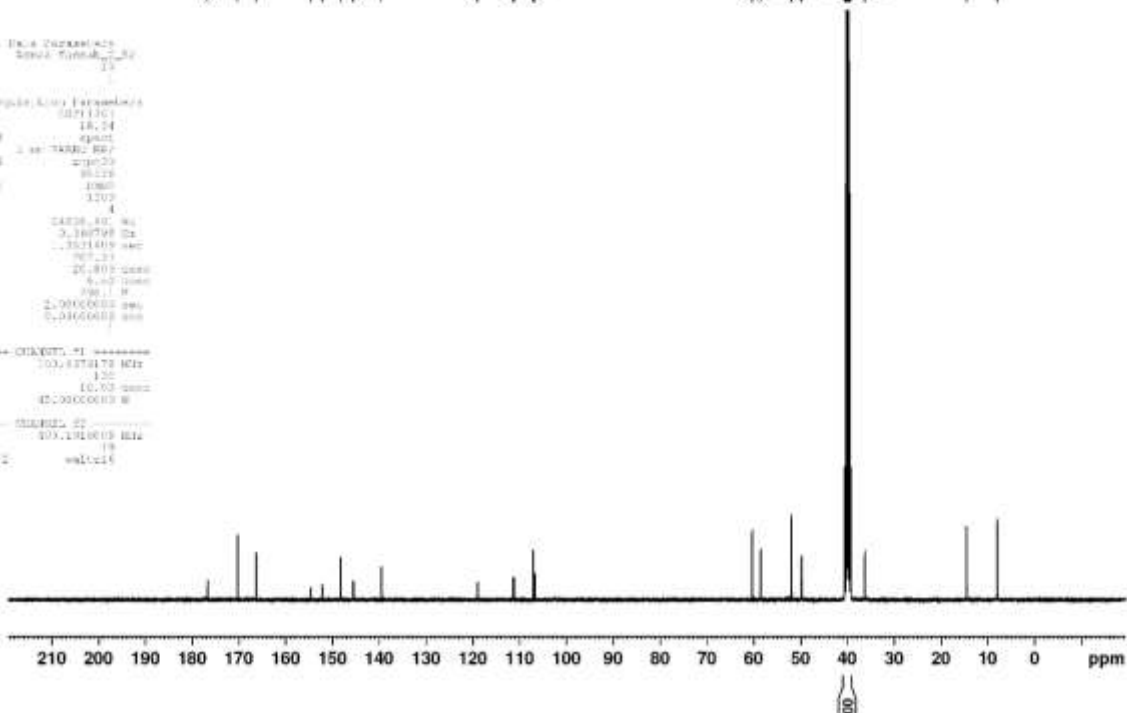

# Compound 9b

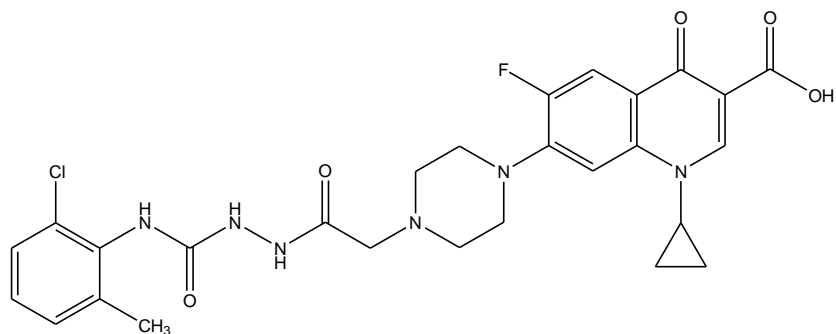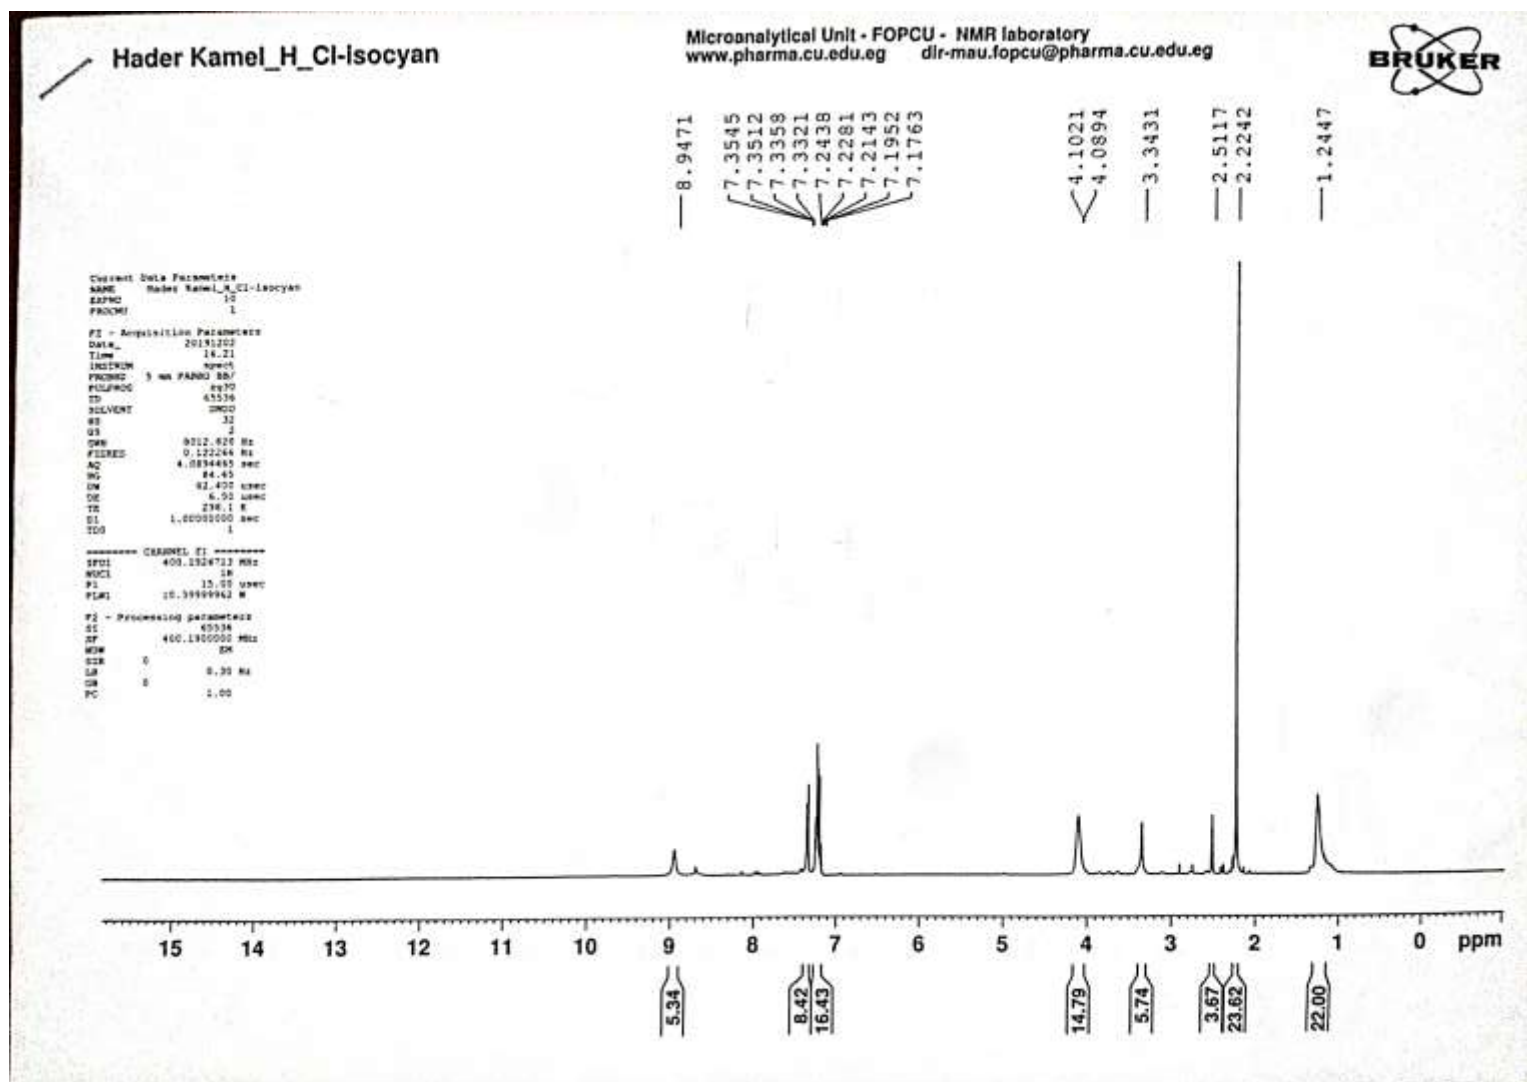

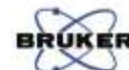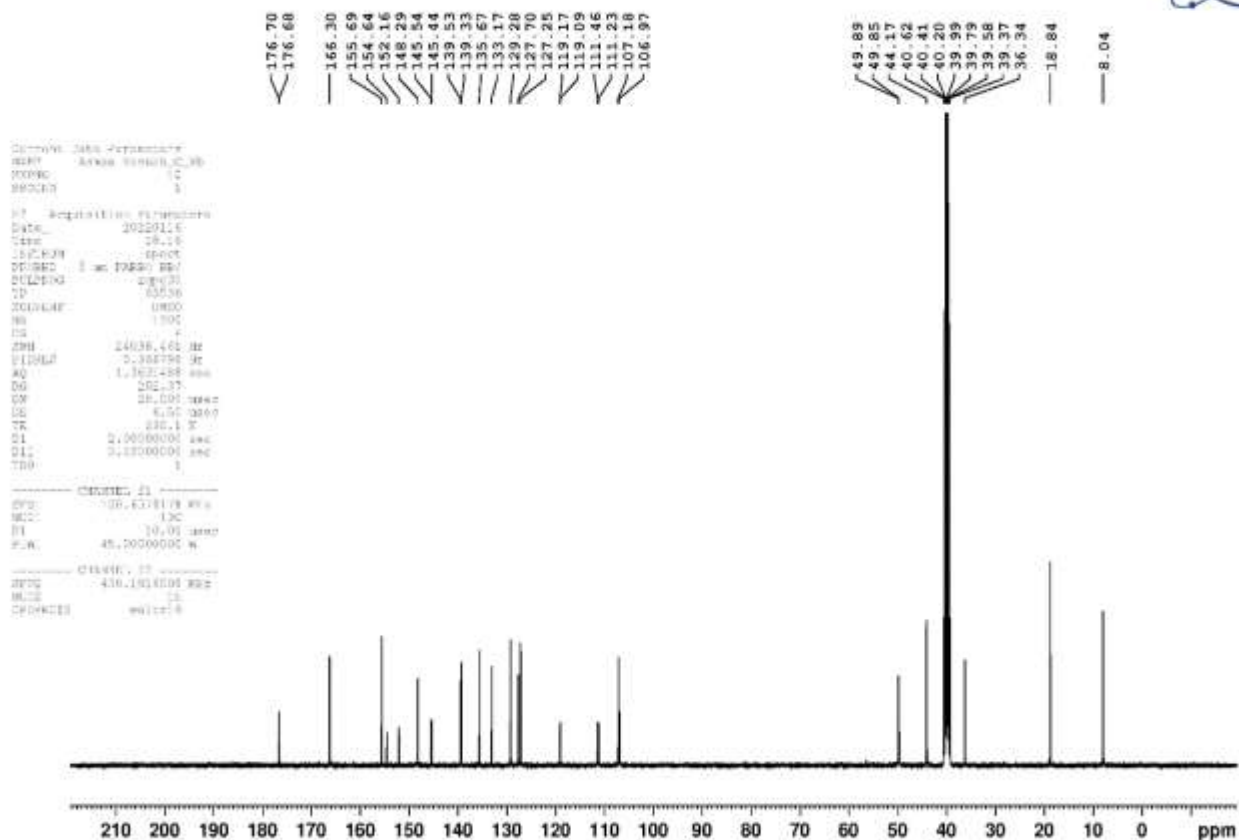



# Compound 9c

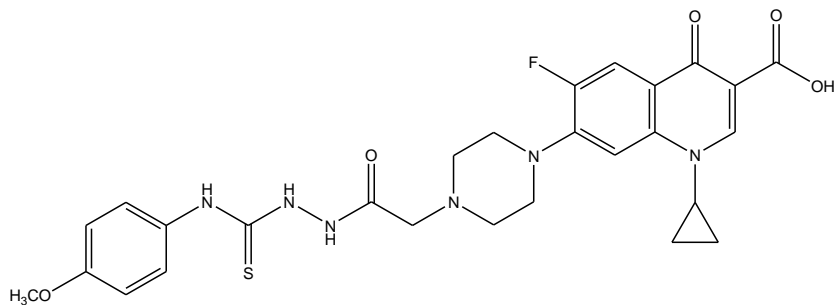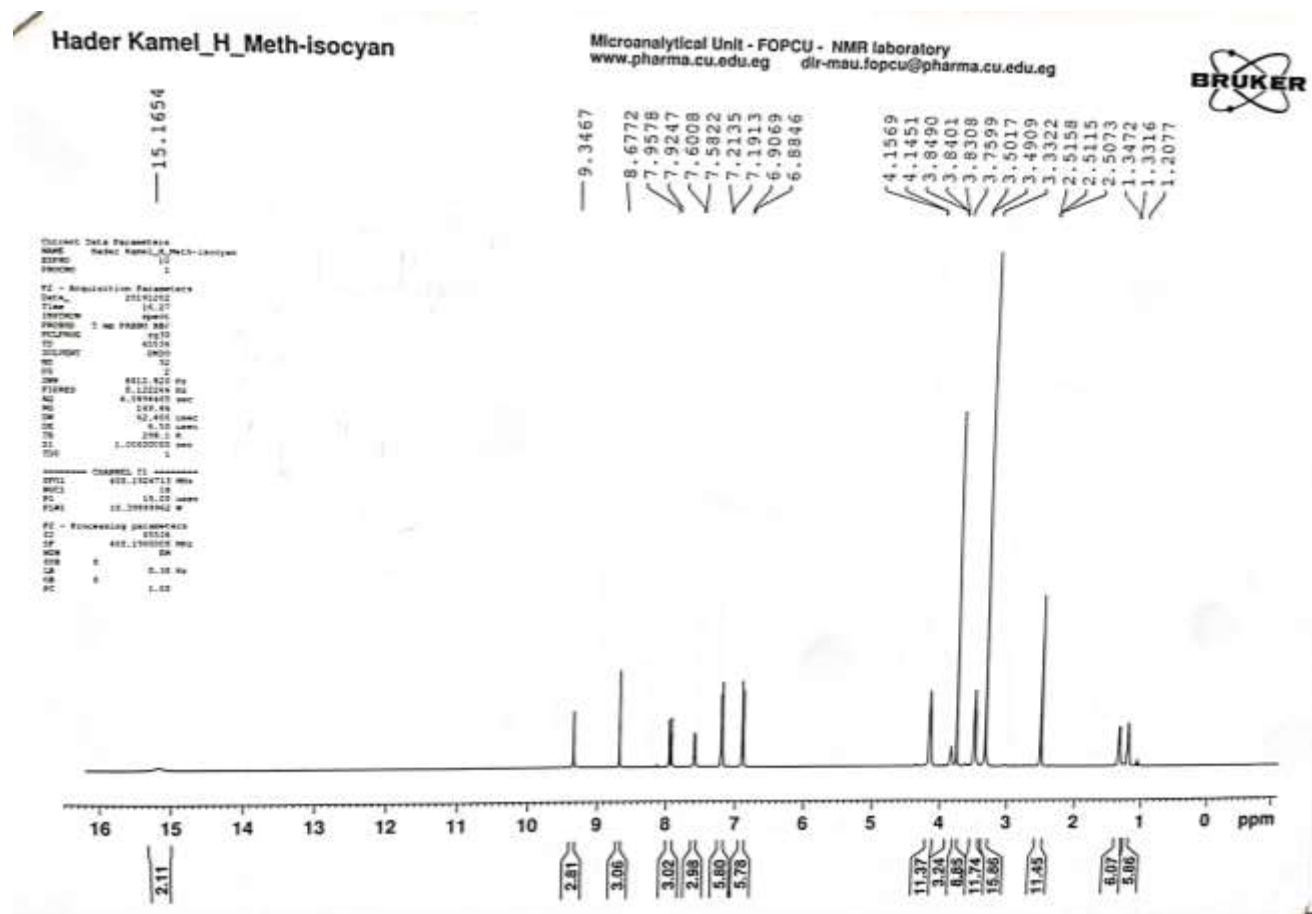

# Hadeer Kamel\_C\_Methoxy-Iso-Cyn

Microanalytical Unit - FOPCU - NMR laboratory  
www.pharma.cu.edu.eg dir-mau.fopcu@pharma.cu.edu.eg

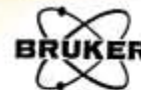

182.22  
176.76  
166.50  
157.02  
151.95  
148.42  
145.16  
145.06  
139.62  
134.16  
127.87  
118.94  
118.86  
113.76  
111.55  
111.32  
107.12  
106.53  
55.66  
49.18  
47.72  
40.47  
40.26  
40.06  
39.85  
39.64  
39.43  
39.22  
36.35  
8.06

Current Data Parameters  
NAME Hadeer Kamel\_C\_Methoxy-  
EXPNO 10  
PROCNO 1

F2 - Acquisition Parameters  
Date\_ 20191224  
Time 11.22  
INSTRUM spect  
PROBHD 5 mm PABBO BB/  
PULPROG zgpg30  
TD 65536  
SOLVENT DMSO  
NS 300  
DS 4  
SWH 24038.461 Hz  
FIDRES 0.366798 Hz  
AQ 1.3631488 sec  
RG 202.37  
DW 20.800 usec  
DE 6.50 usec  
TE 298.1 K  
D1 2.00000000 sec  
D11 0.03000000 sec  
TD0 1

----- CHANNEL f1 -----  
SFO1 100.6379178 MHz  
NUC1 13C  
P1 10.00 usec  
PLW1 45.00000000 W

----- CHANNEL f2 -----  
SFO2 400.1916008 MHz  
NUC2 1H  
CPDPRG[2] waltz16

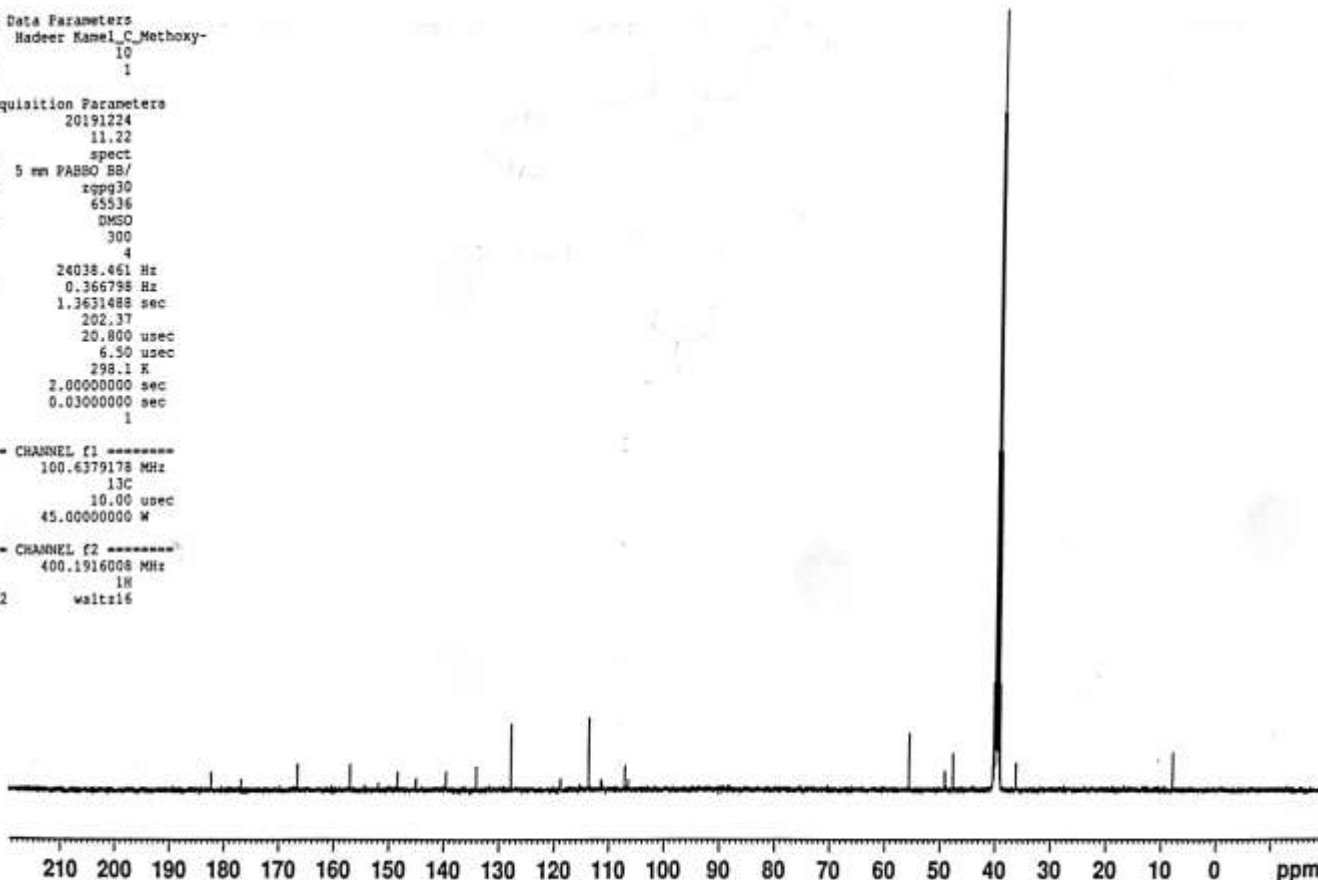

# Compound 10a

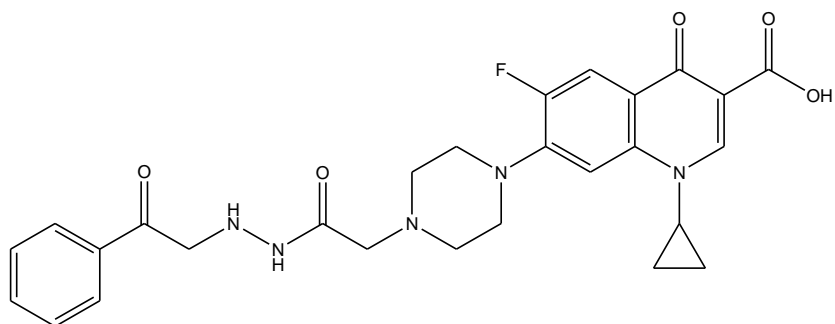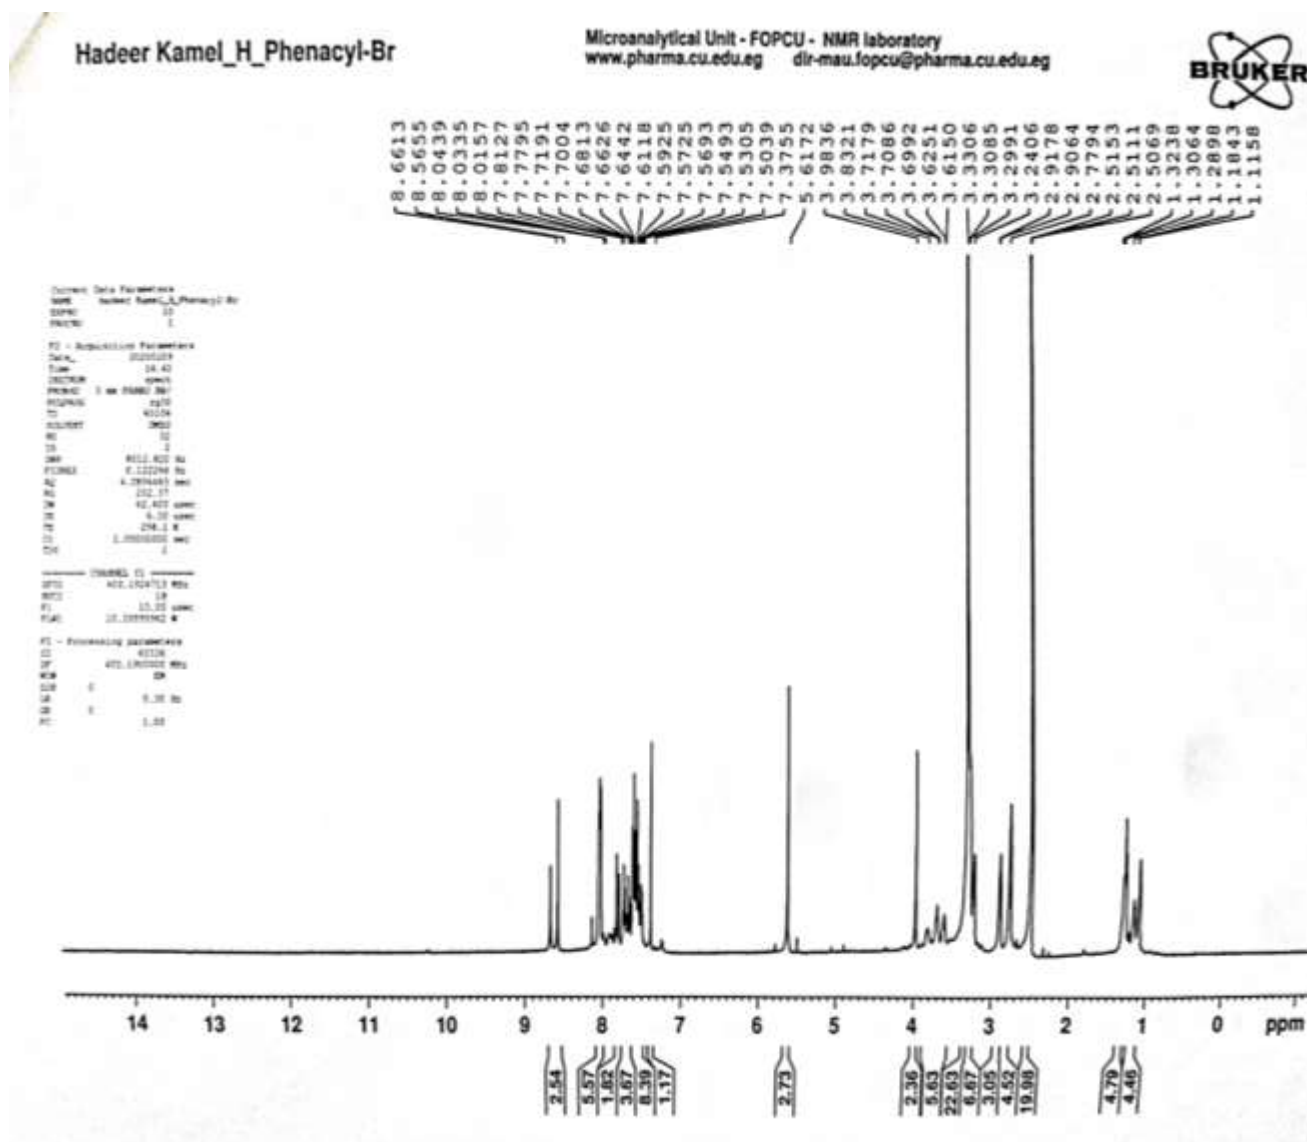

# Compound 10b

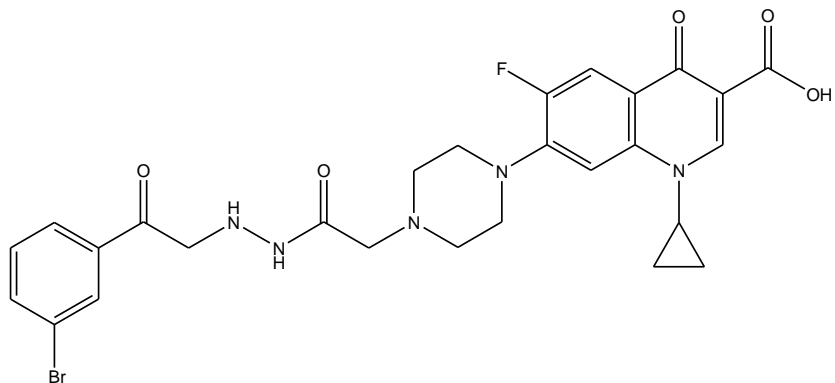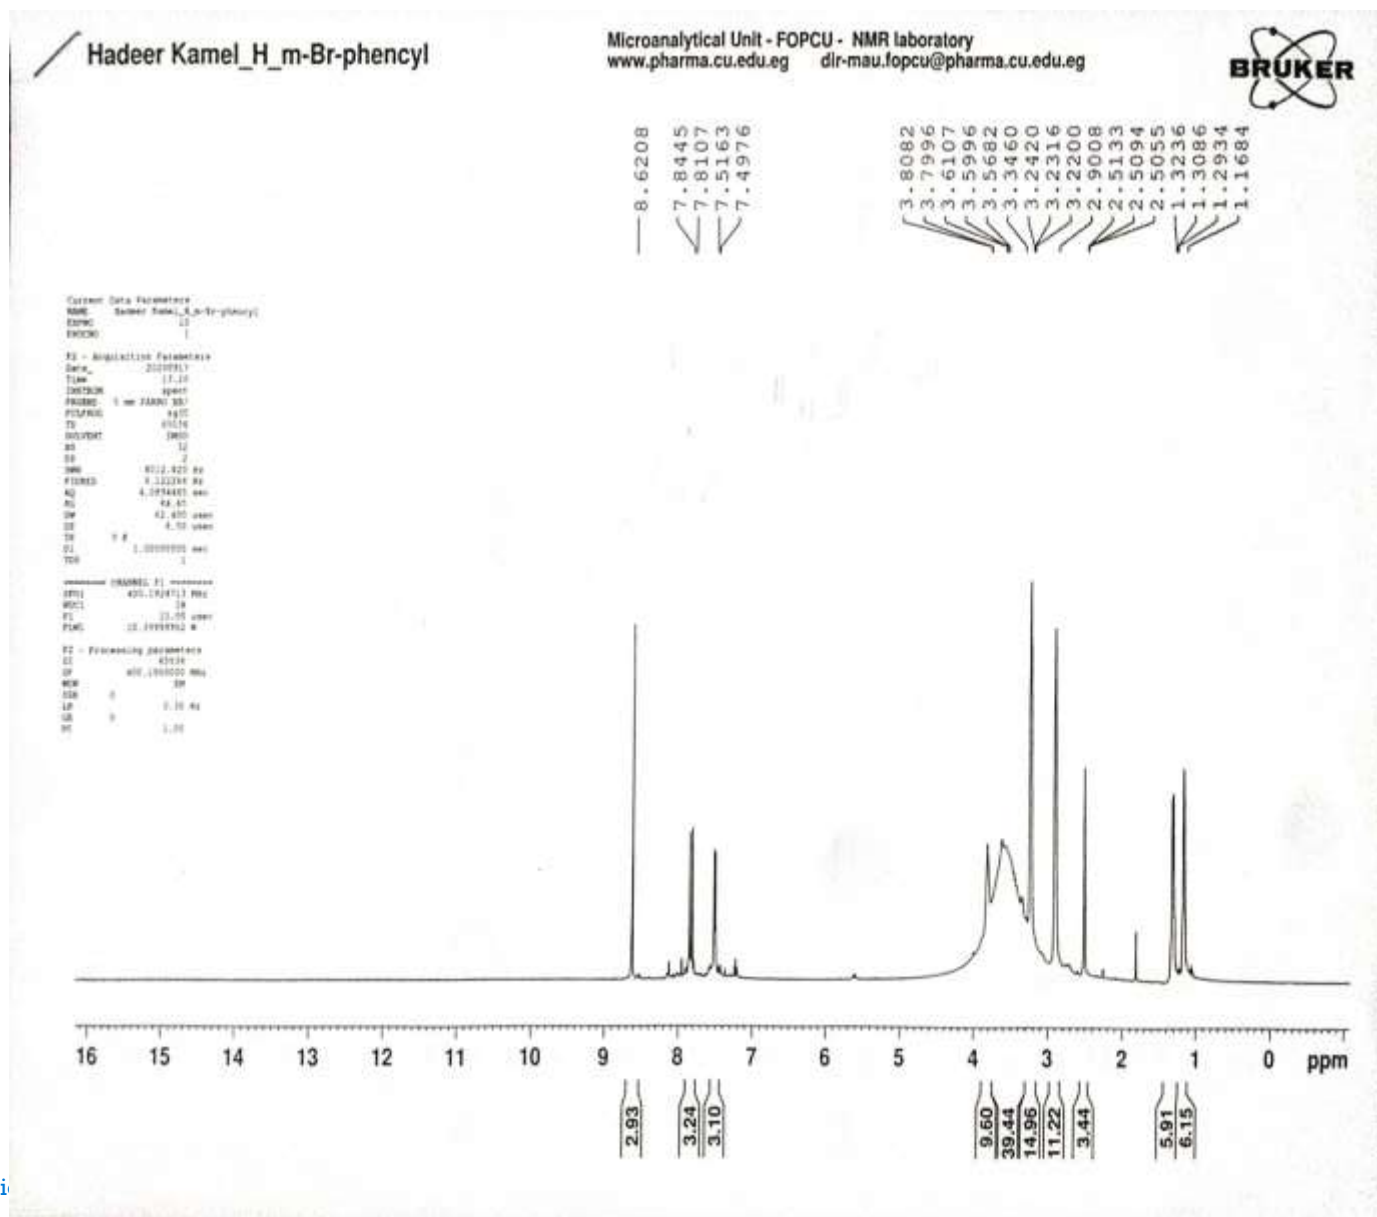

Asmaa Kassab\_C\_XIVb

Microanalytical Unit - FOPCU - NMR laboratory  
www.pharma.cu.edu.eg dir-mau.fopcu@pharma.cu.edu.eg

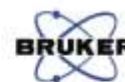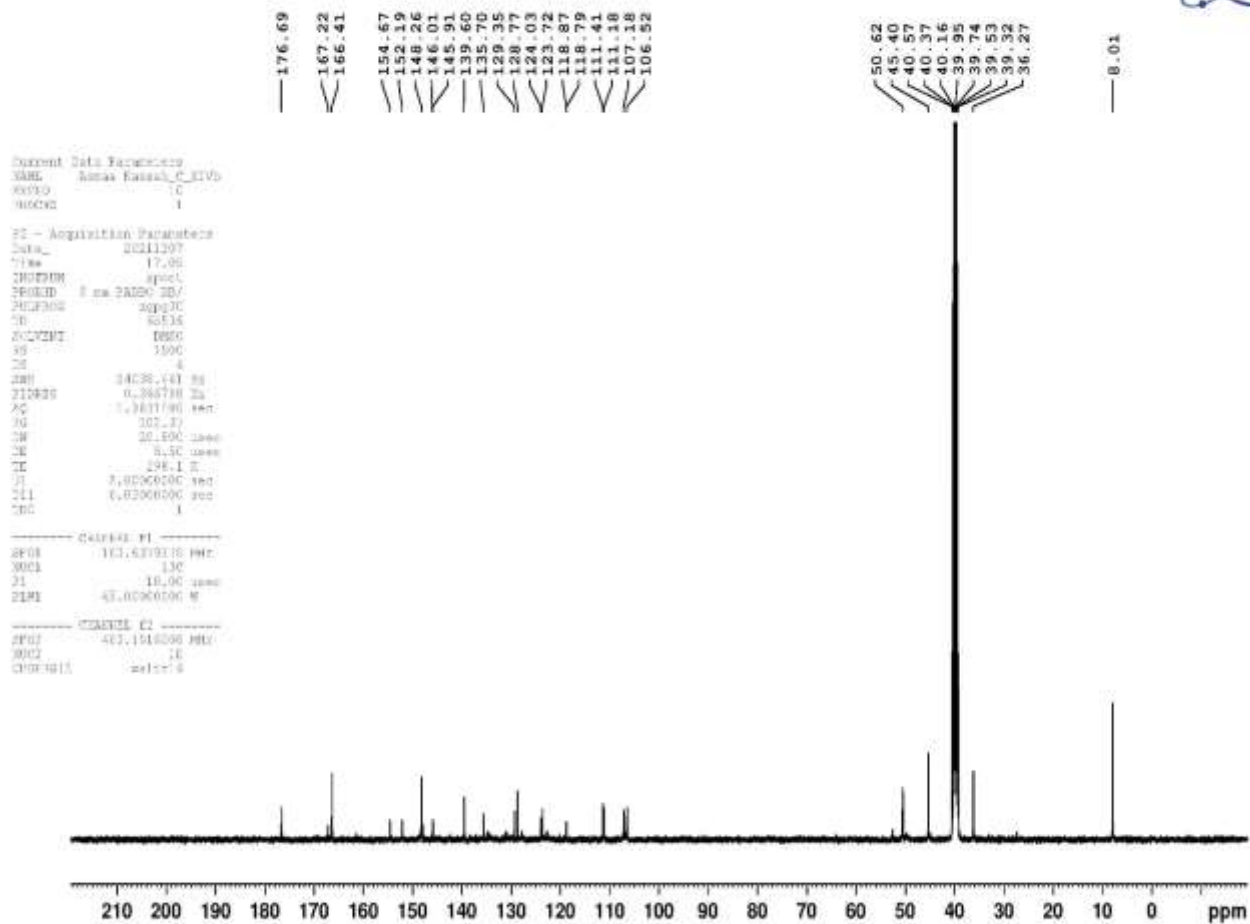

# Compound 10c

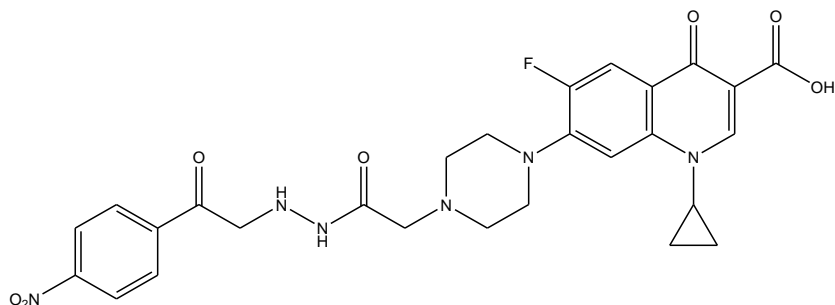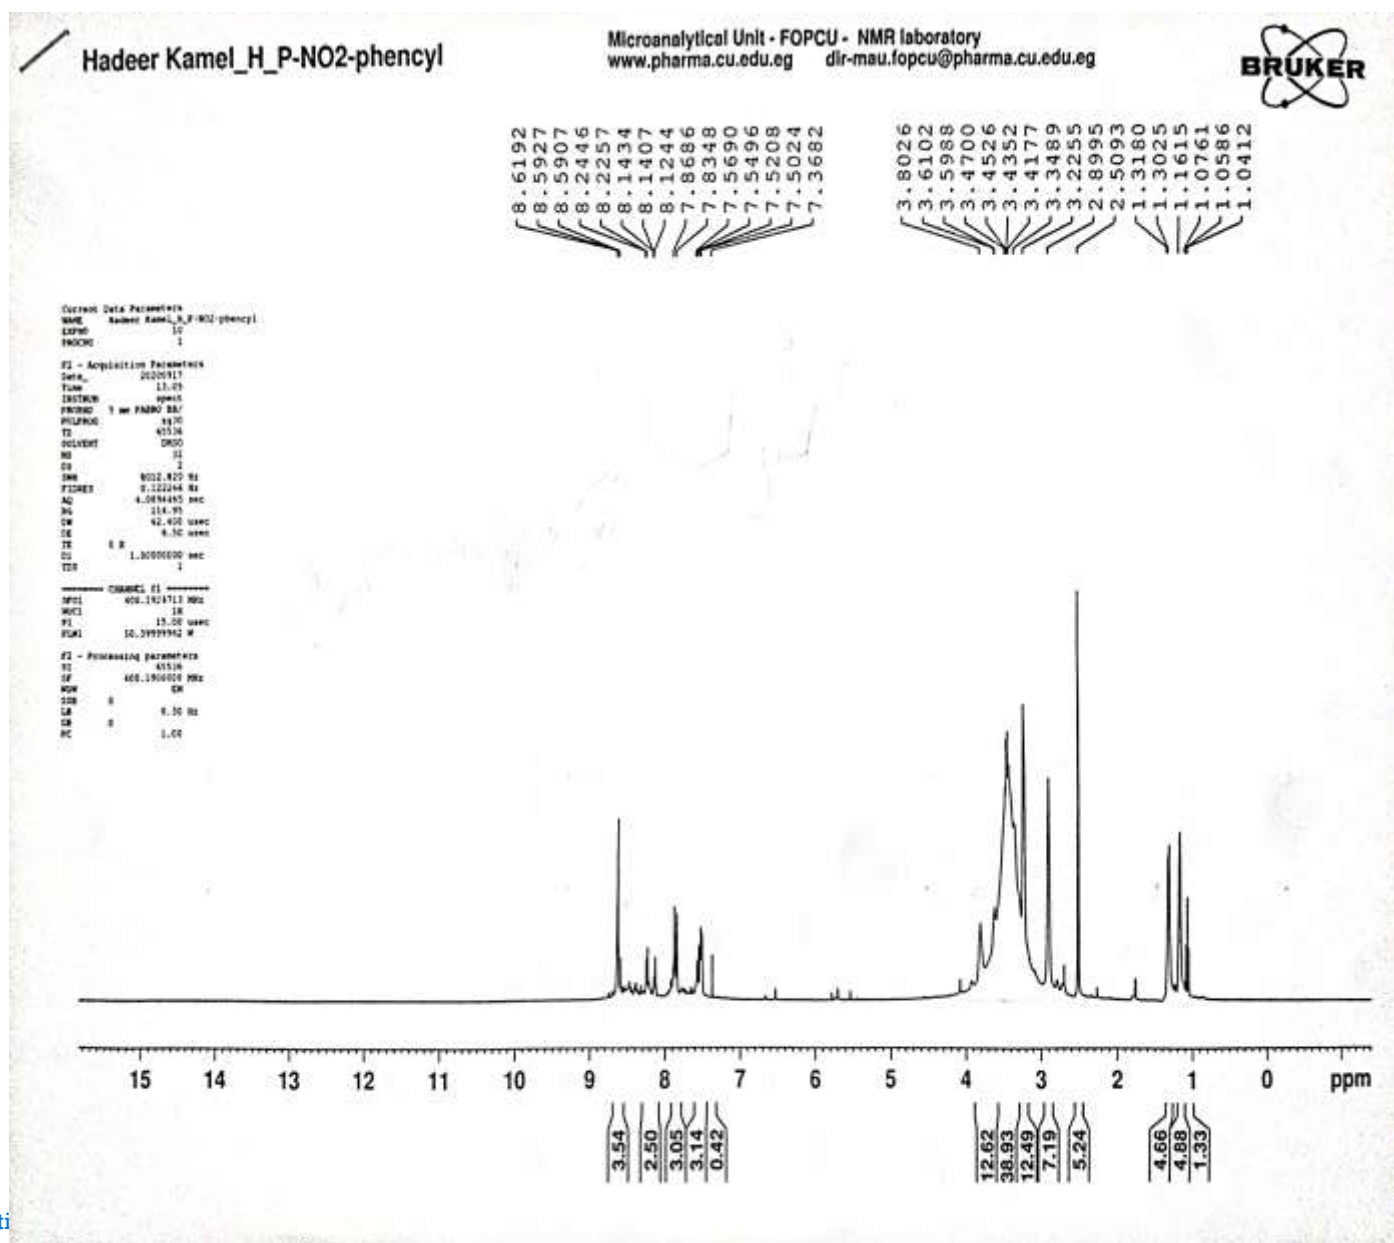

Asmaa Kassab\_C\_XIVC

Microanalytical Unit - FOPCU - NMR laboratory  
www.pharma.cu.edu.eg dir-mau.fopcu@pharma.cu.edu.eg

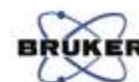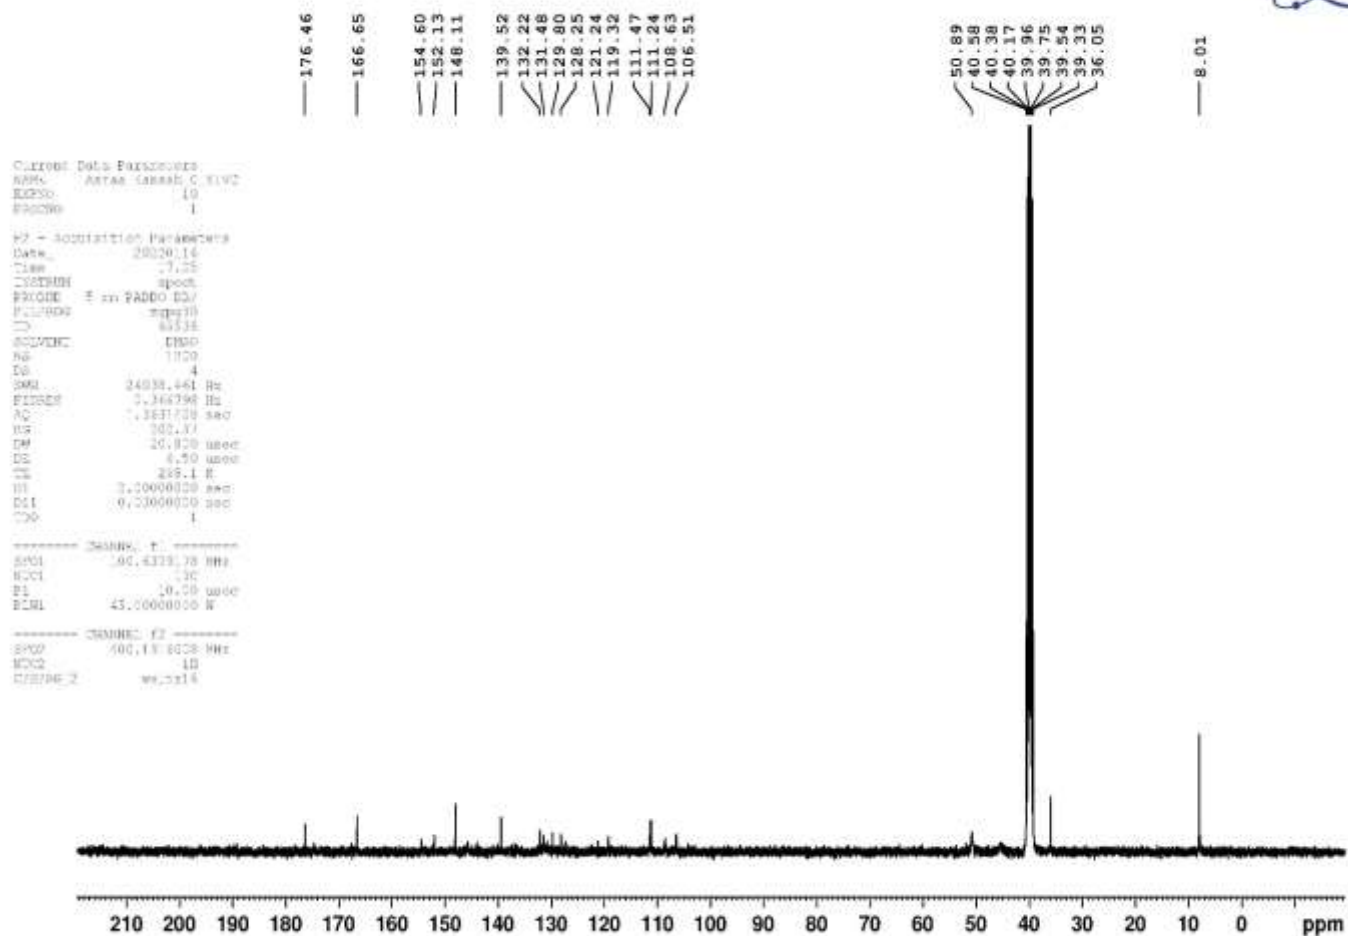

# Compound 11

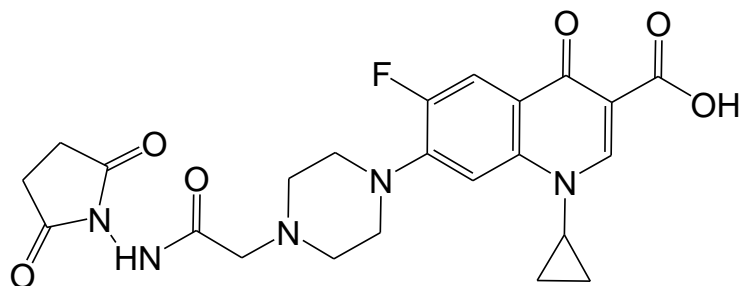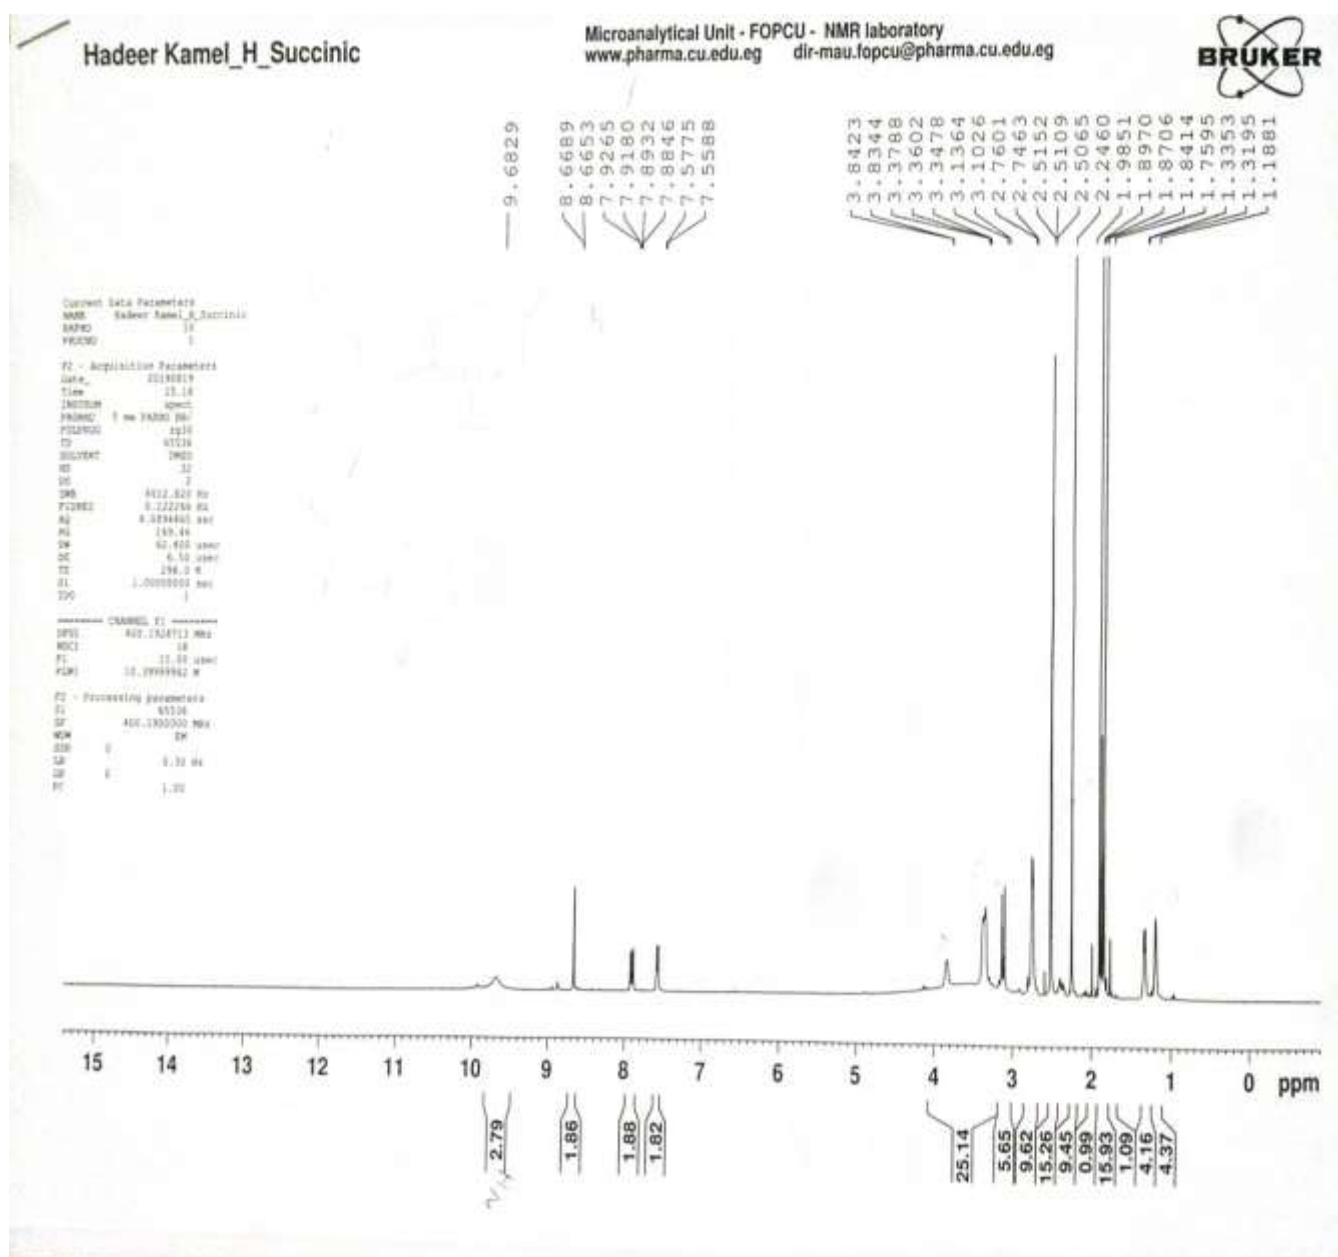



Asmaa Kassab\_C\_XII

Microanalytical Unit - FOPCU - NMR laboratory  
www.pharma.cu.edu.eg dir-mau.fopcu@pharma.cu.edu.eg

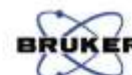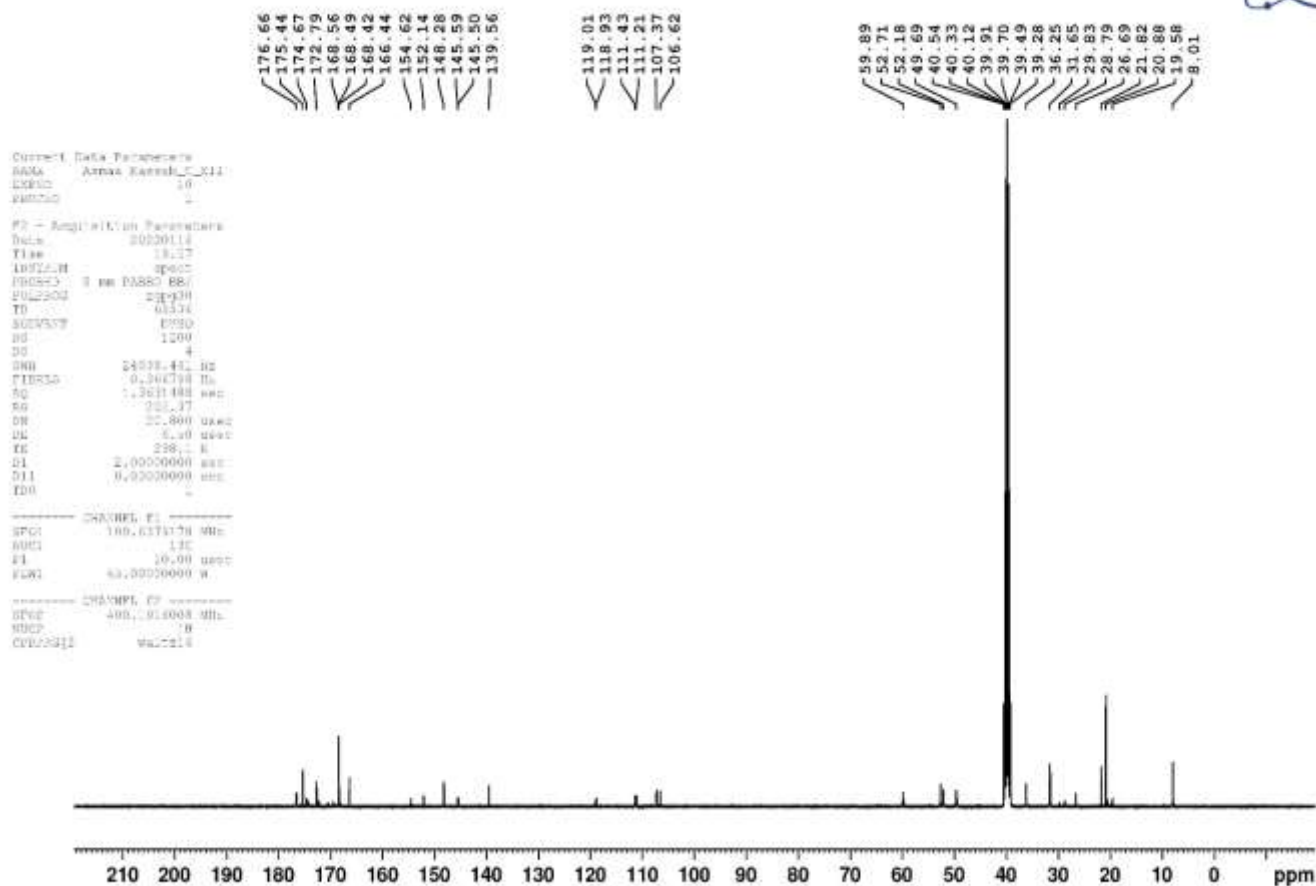

# Compound 12

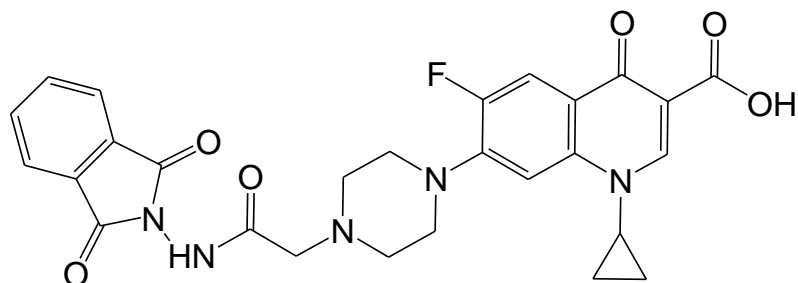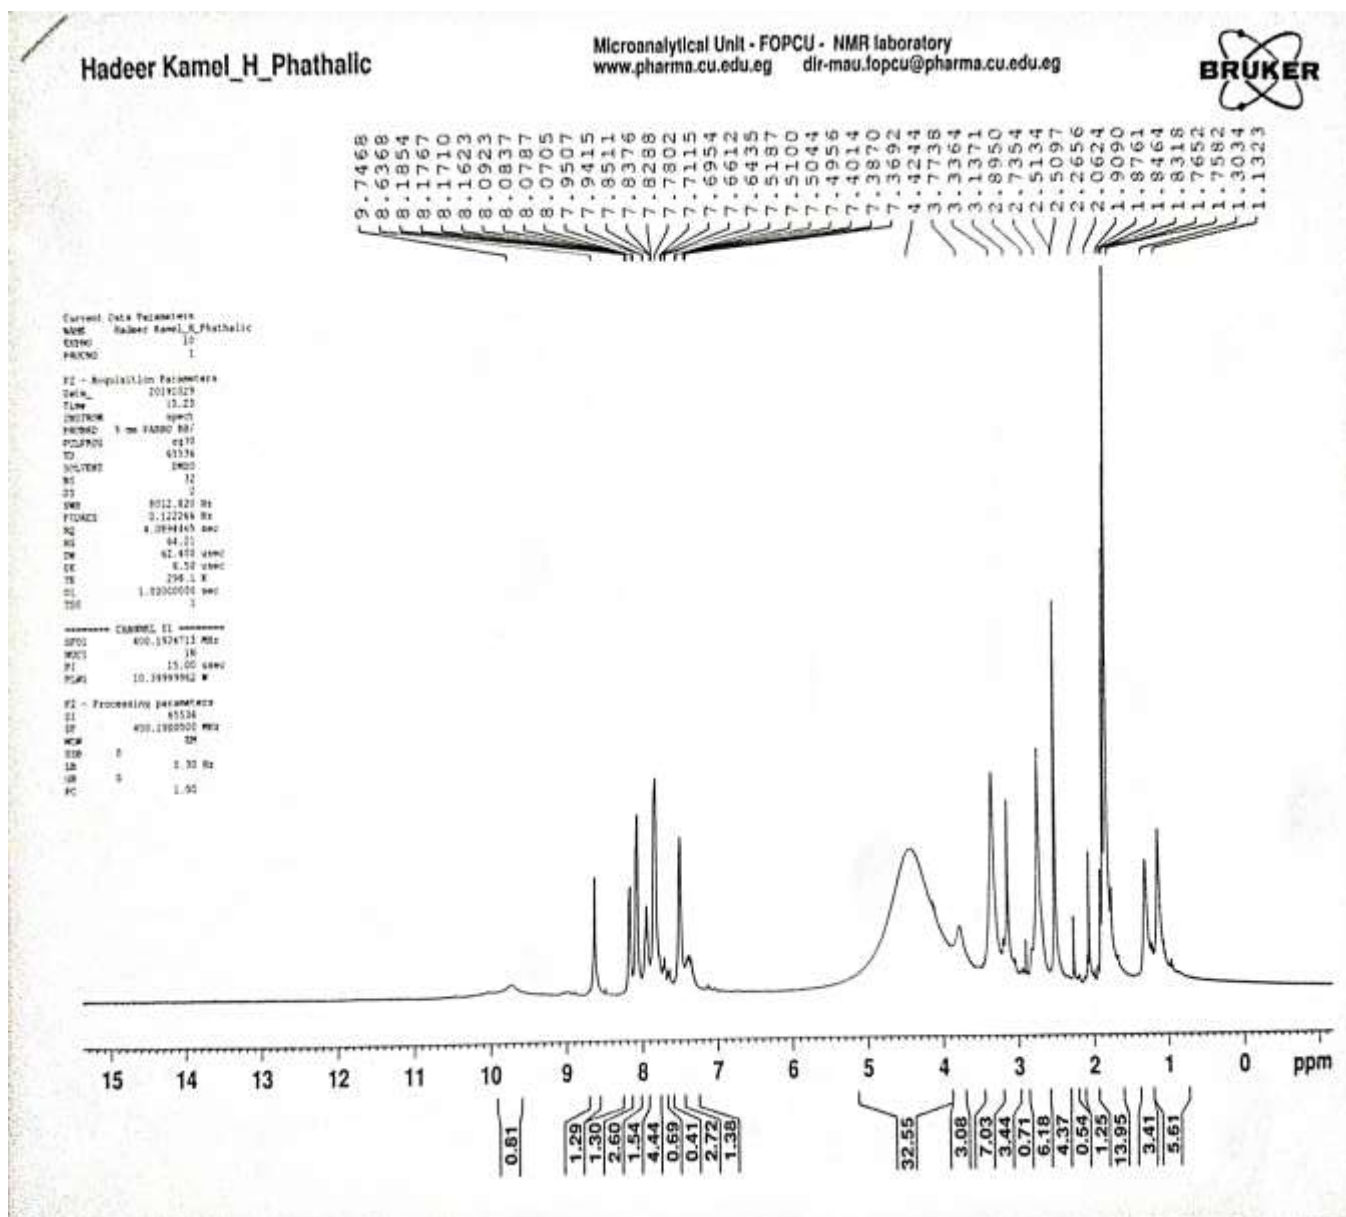

# Compound 13

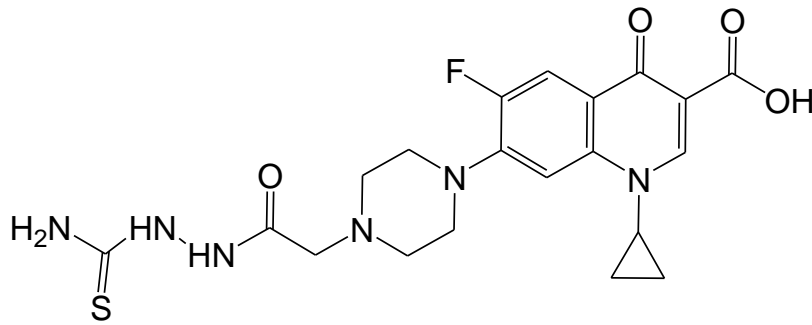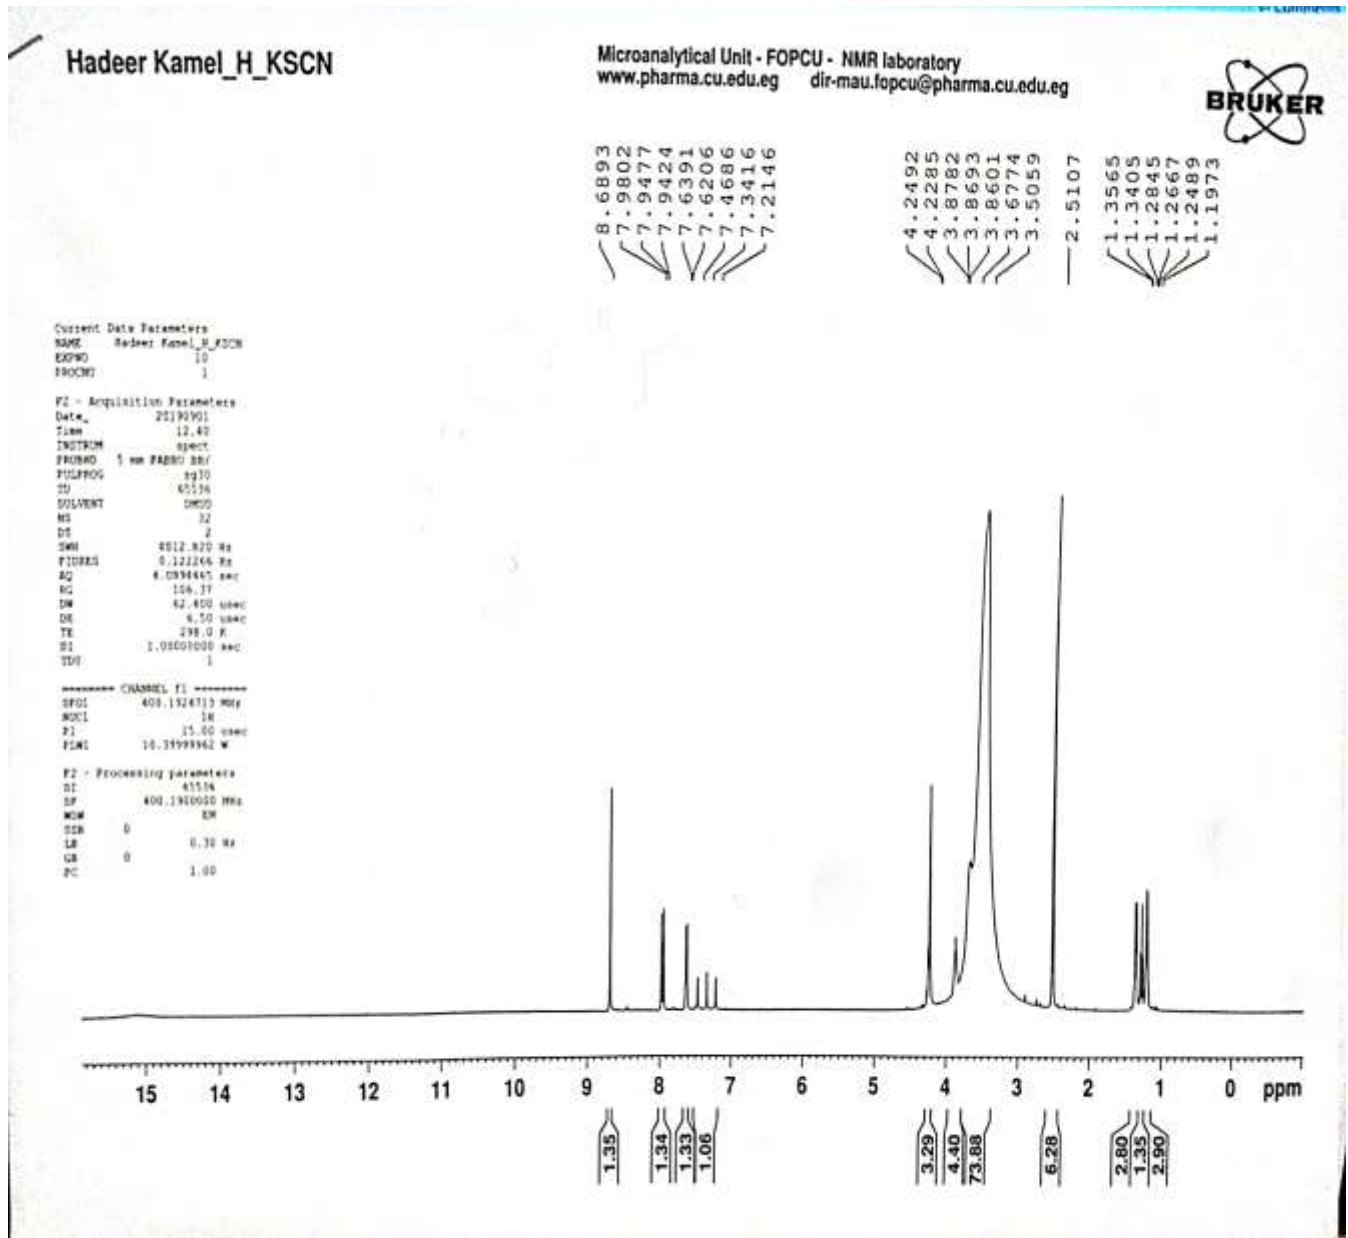

Asmaa Kassab\_C\_XV

Microanalytical Unit - FOPCU - NMR laboratory  
www.pharma.cu.edu.eg dir-mau.fopcu@pharma.cu.edu.eg

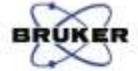

176.75  
168.51  
166.32  
166.29  
154.59  
154.54  
152.11  
152.06  
148.50  
148.42  
144.96  
144.86  
144.48  
144.38  
139.53  
139.51  
130.08  
119.65  
119.57  
119.39  
119.31  
111.67  
111.57  
111.44  
111.34  
107.25  
107.10

61.30  
56.95  
56.74  
54.84  
51.06  
49.33  
47.33  
45.86  
40.39  
40.18  
39.57  
39.76  
39.55  
39.34  
36.44  
36.40  
34.56  
17.02  
14.51  
8.91  
8.08

Current Build Parameters  
NAME Asmaa Kassab\_C\_XV  
EXPNO 10  
PROCNO 1

F2 - Acquisition Parameters  
DATE\_ 20111220  
TIME 7:20  
F2OPROB spect  
PROBHD 5 mm BBOBO 50/  
PULPROG zgpg30  
TD 65536  
SOLVENT  
AQ 1.000  
RG 320  
DD 4  
SFO 500.136114 Hz  
FIDRES 0.186138 Hz  
AQ 1.181148 sec  
RG 320.33  
RN 79.800 MHz  
DS 2.00 MHz  
SS 164.1 Hz  
SI 2.00000000 sec  
D11 0.03000000 sec  
TD 1

===== CHANNEL f1 =====  
NUC1 13C  
P1 10.00 MHz  
PCPD 45.00000000 W

===== CHANNEL f2 =====  
NUC2 13C  
P2 10.00 MHz  
PCPD 45.00000000 W

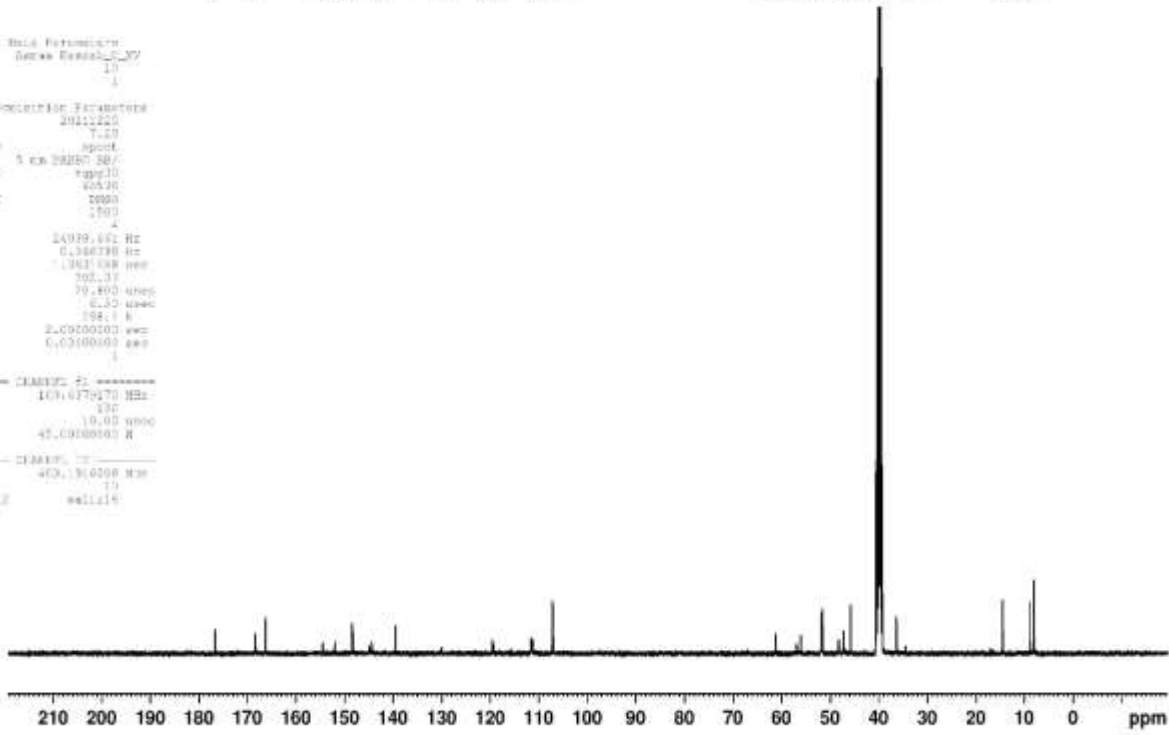

# Compound 14

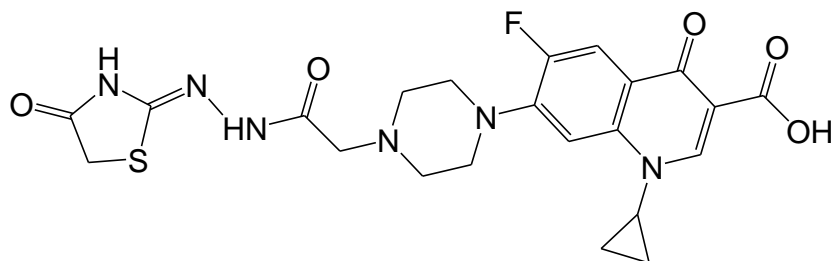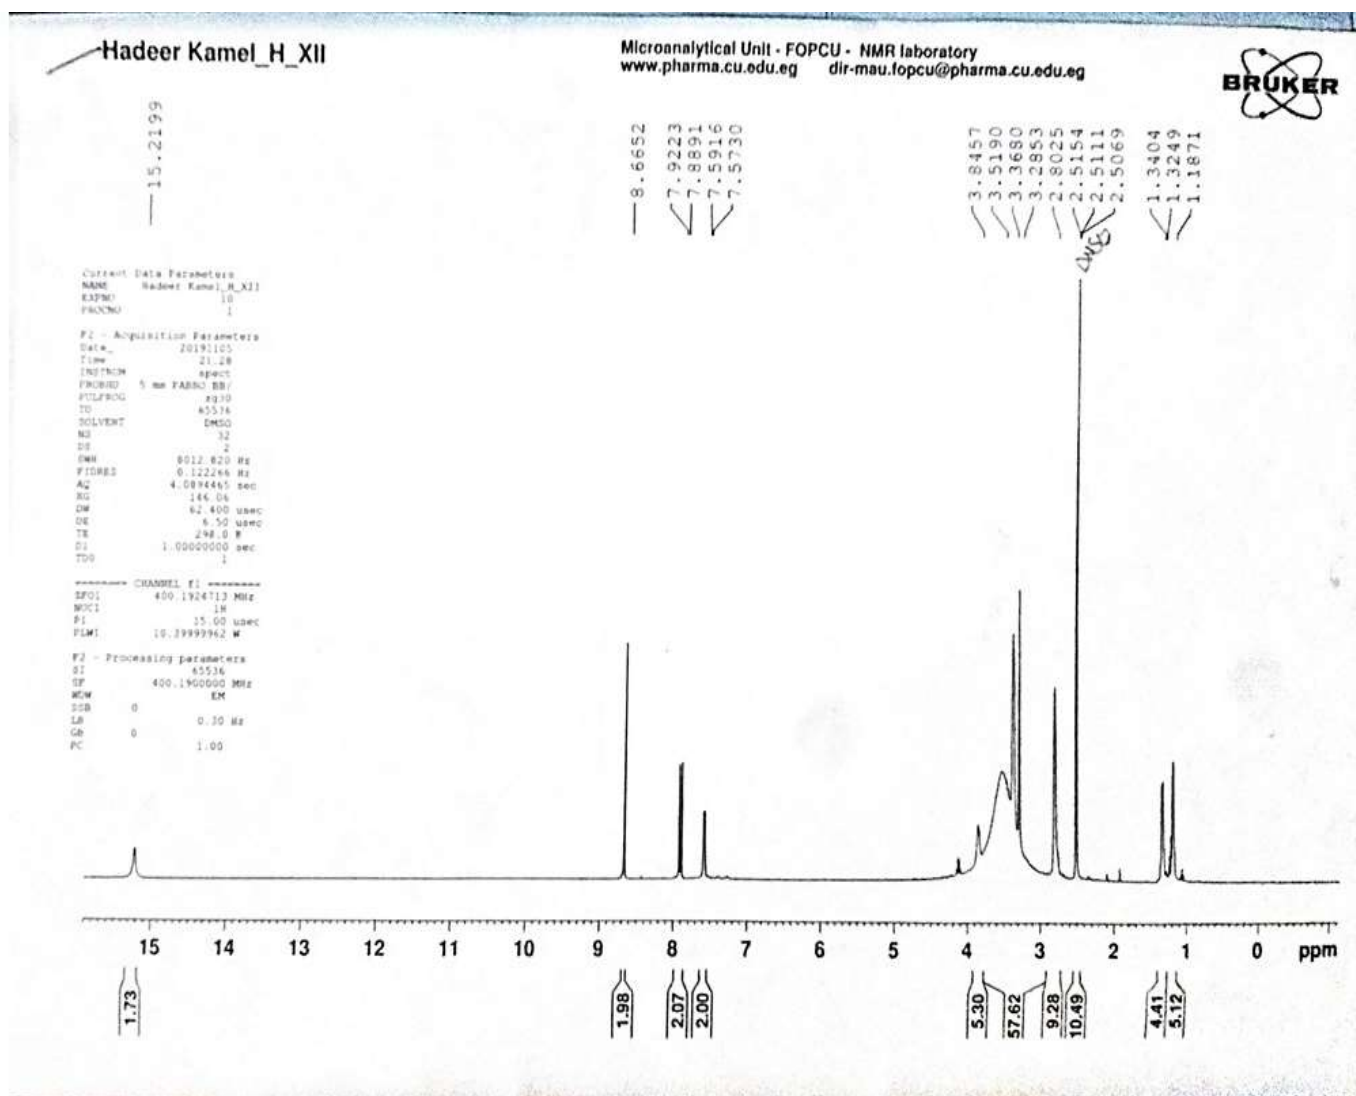

# Compound 15

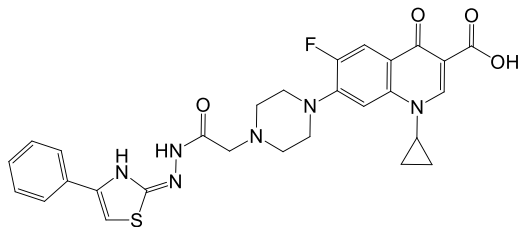

Hadeer Kamel\_H\_XIIV

Microanalytical Unit - FOPCU - NMR laboratory  
www.pharma.cu.edu.eg dir-mau.fopcu@pharma.cu.edu.eg

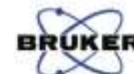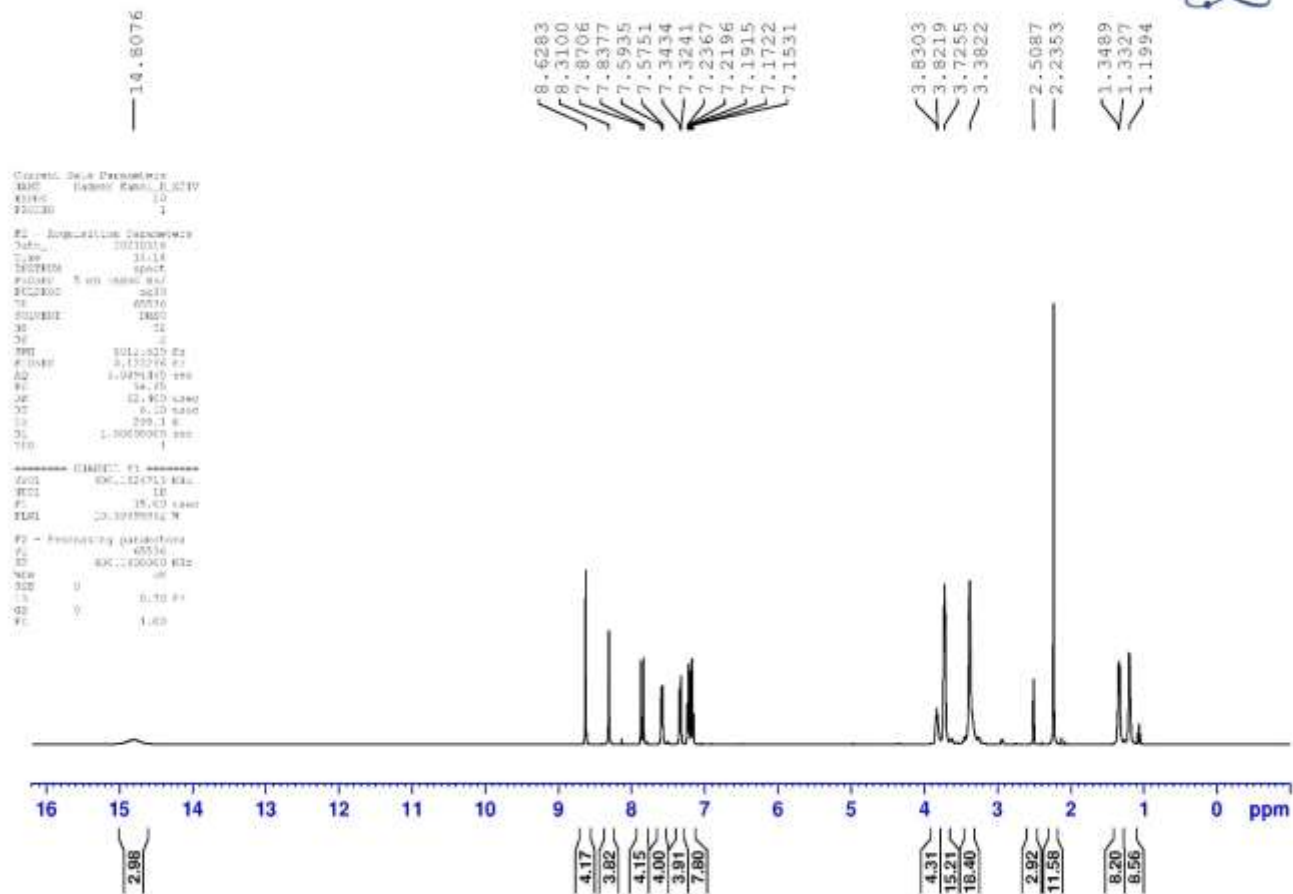

Supplement: IENZ_A_2136172_SM7502.pdf [file IENZ_A_2136172_SM7502.pdf]
